# Supplementary material
Source: PubMed Central journal article supplement (PMC2846238)
Supplement: NIHMS162515-supplement-1_si_001.pdf [file NIHMS162515-supplement-1_si_001.pdf]

## Supporting Information

### 4-Arylflavan-3-ols as Proanthocyanidin Models: Absolute Configuration via Density Functional Calculation of Electronic Circular Dichroism

Yuanqing Ding,<sup>†</sup> Xing-Cong Li,<sup>\*,†,‡</sup> and Daneel Ferreira<sup>\*,†,‡</sup>

*National Center for Natural Products Research, Research Institute of Pharmaceutical*

*Sciences, and Department of Pharmacognosy, School of Pharmacy, The University*

*of Mississippi, University, Mississippi 38677*

#### Supporting Information Table of Contents

|                                                                                                    |    |
|----------------------------------------------------------------------------------------------------|----|
| <b>Figure S1.</b> Optimized geometries of <b>2a</b> -----                                          | 2  |
| <b>Figure S2.</b> Optimized geometries of <b>3a</b> -----                                          | 3  |
| <b>Figure S3.</b> Optimized geometries of <b>4a</b> -----                                          | 4  |
| <b>Table S1.</b> Important Thermodynamic Parameters of Compound <b>1a</b> (au)-----                | 5  |
| <b>Table S2.</b> Important Thermodynamic Parameters of Compound <b>1b</b> (au)-----                | 5  |
| <b>Table S3.</b> The key dihedral angles of compound <b>2a</b> -----                               | 5  |
| <b>Table S4.</b> Conformational Analysis of Compound <b>2a</b> -----                               | 6  |
| <b>Table S5.</b> Important Thermodynamic Parameters of Compound <b>3a</b> (au)-----                | 6  |
| <b>Table S6.</b> Important Thermodynamic Parameters of Compound <b>4a</b> (au)-----                | 6  |
| <b>Table S7.</b> Conformational Analysis of Compound <b>4a</b> -----                               | 7  |
| <b>Table S8.</b> The Geometric Parameters of Conformers of Compounds <b>1a</b> and <b>1b</b> (Å)-- | 7  |
| <b>Table S9.</b> The Geometric Parameters of Conformers of Compound <b>2a</b> (Å)-----             | 15 |
| <b>Table S10.</b> The Geometric Parameters of Conformers of Compound <b>3a</b> (Å)-----            | 19 |
| <b>Table S11.</b> The Geometric Parameters of Conformers of Compound <b>4a</b> (Å) -----           | 21 |
| <b>Table S12.</b> Frequencies of Compounds <b>1a</b> and <b>1b</b> -----                           | 26 |
| <b>Table S13.</b> Frequencies of Compound <b>2a</b> -----                                          | 29 |
| <b>Table S14.</b> Frequencies of Compound <b>3a</b> -----                                          | 31 |
| <b>Table S15.</b> Frequencies of Compound <b>4a</b> -----                                          | 32 |

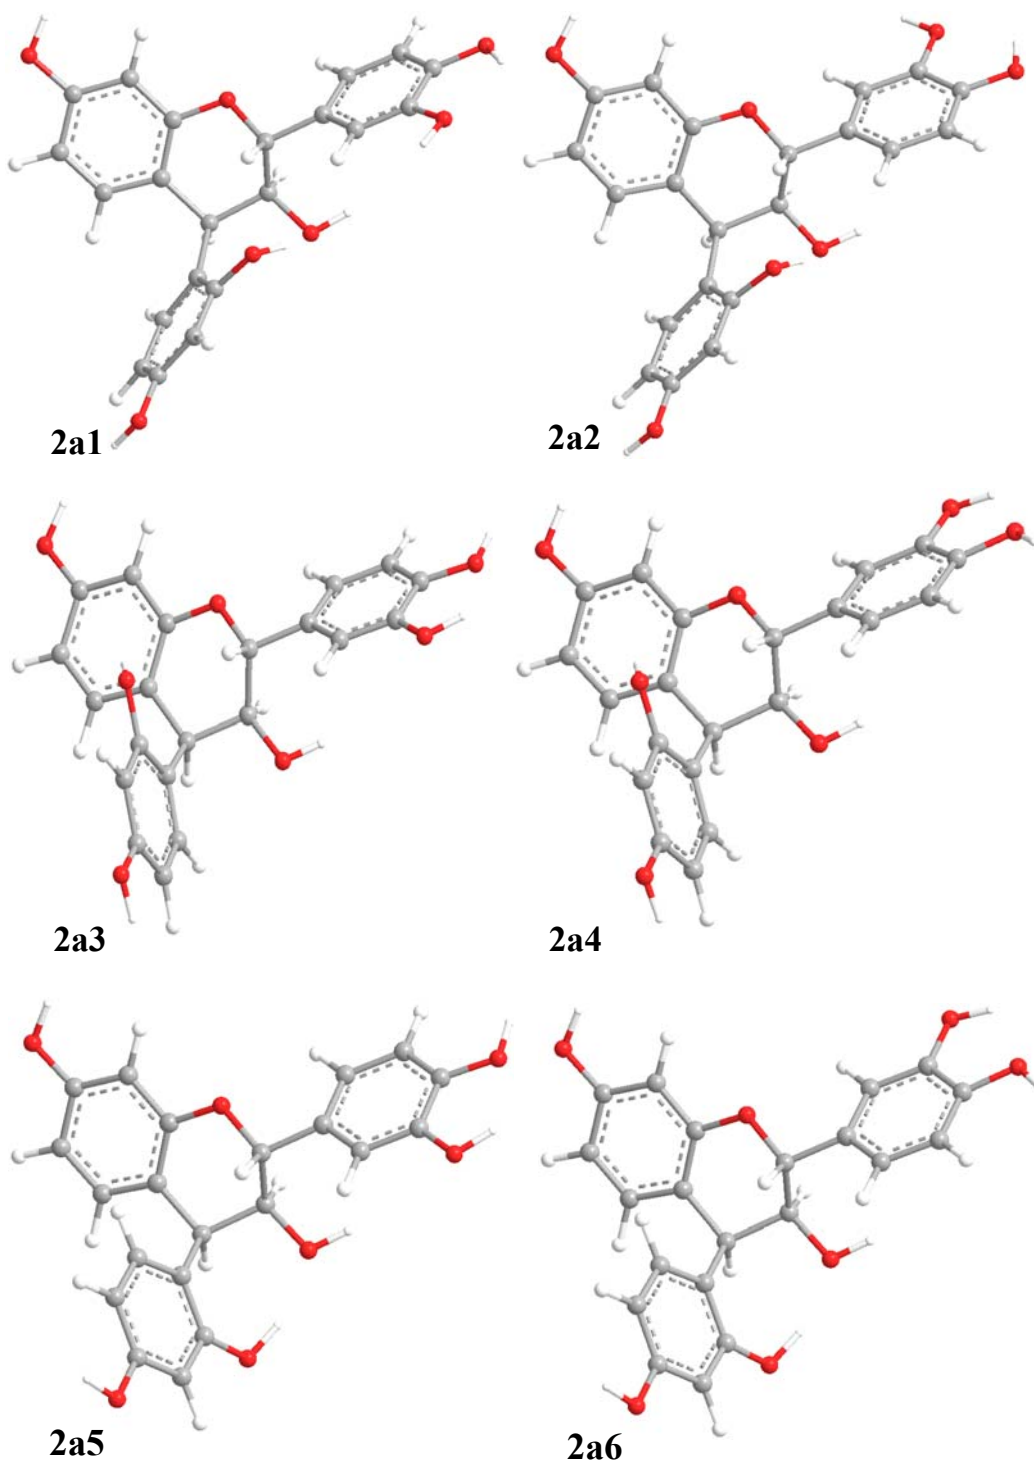

**Figure S1.** Optimized geometries of (2R,3S,4S)-2,3-trans-3,4-cis-4-arylflavan-3-ol (2a) at B3LYP/6-31G\* level in the gas phase.

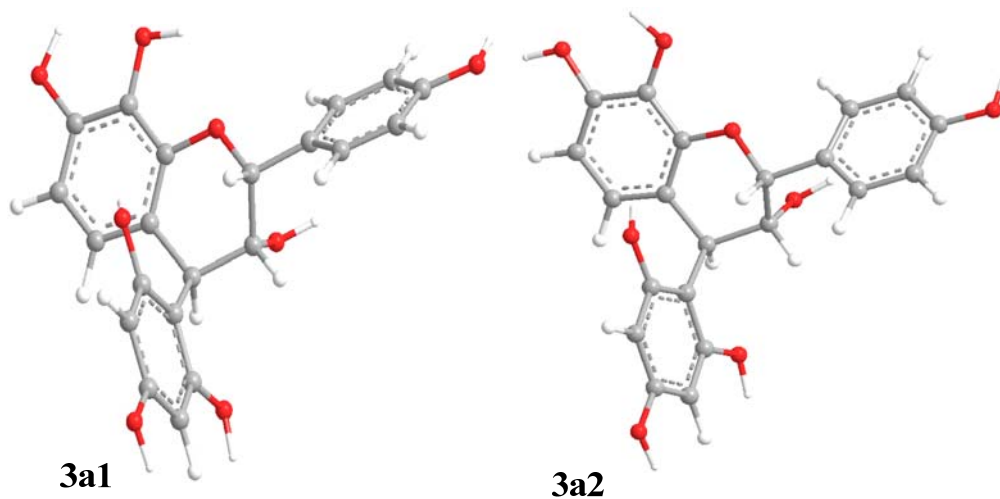

**Figure S2.** Optimized geometries of (2R,3R,4R)-2,3-cis-3,4-trans-4-arylflavan-3-ol (**3a**) at B3LYP/6-31G\* level in the gas phase.

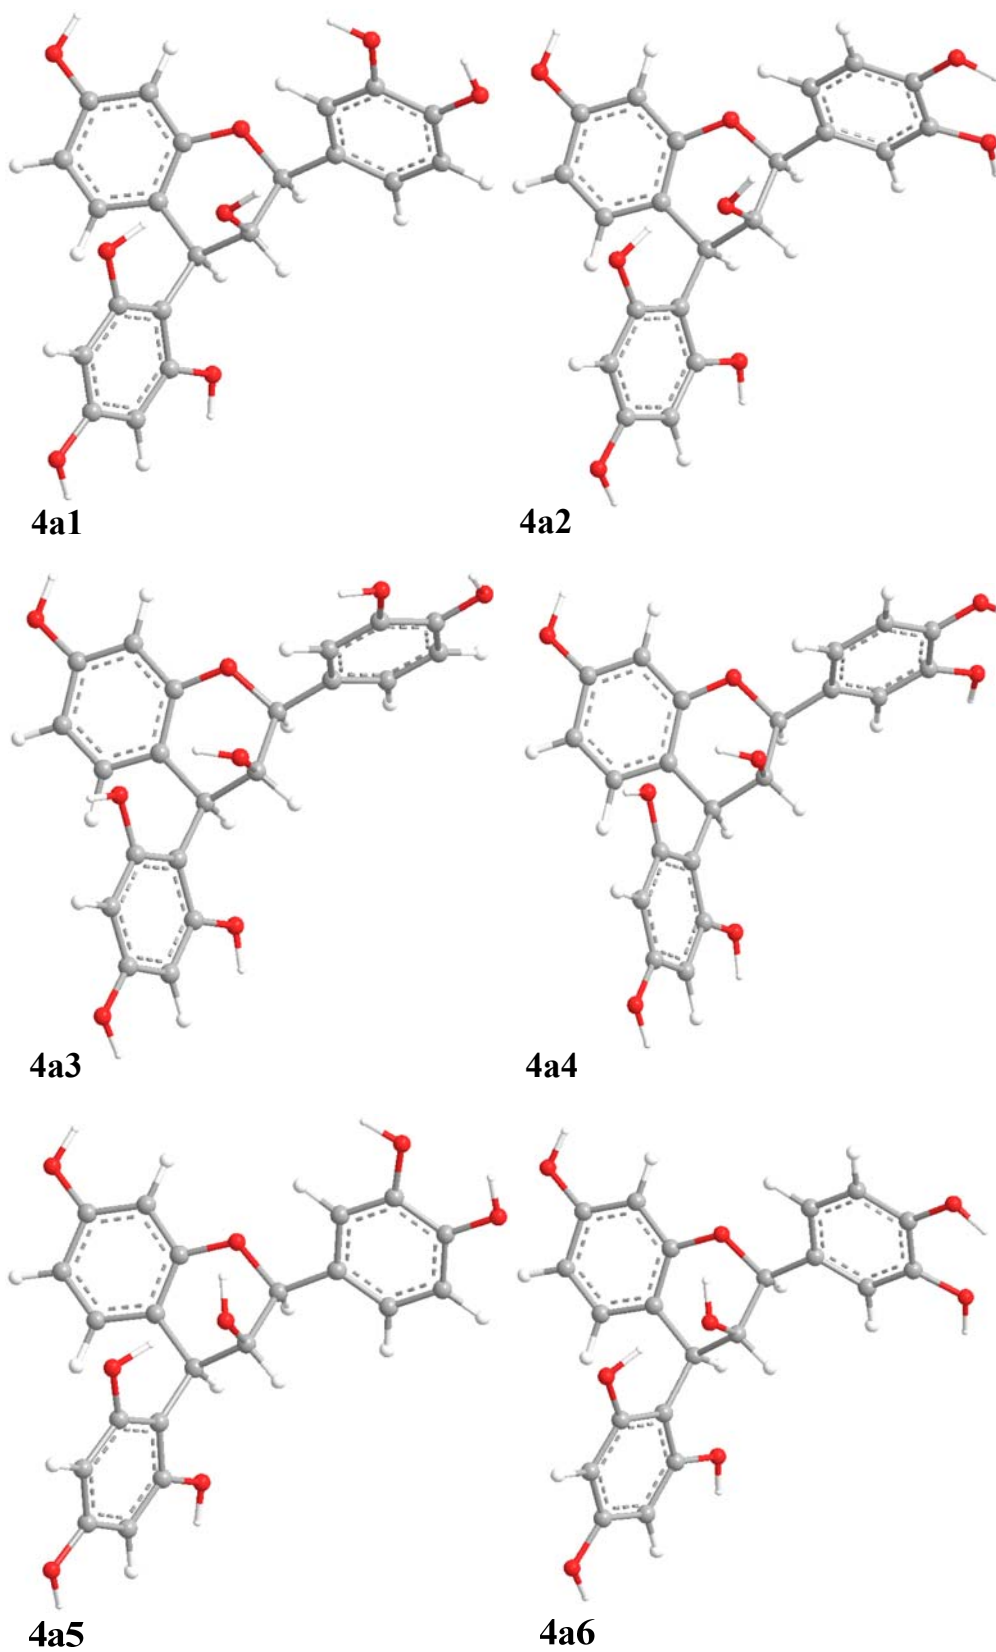

**Figure S3.** Optimized geometries of (2S,3S,4R)-2,3-cis-3,4-cis-4-arylflavan-3-ol (**4a**) at B3LYP/6-31G\* level in the gas phase.

**Table S1.** Important Thermodynamic Parameters of Compound **1a** (au)

| Species    | E             | E'=E+ZPE     | H            | G            | E''           | E <sub>s</sub> |
|------------|---------------|--------------|--------------|--------------|---------------|----------------|
| <b>1a1</b> | -1412.816686  | -1412.455740 | -1412.429638 | -1412.510199 | -1413.2570038 | -1412.8563442  |
| <b>1a2</b> | -1412.816420  | -1412.455544 | -1412.429420 | -1412.510126 | -1413.2569767 | -1412.8566353  |
| <b>1a3</b> | -1412.8075349 | -1412.447698 | -1412.420971 | -1412.503556 | -1413.2491781 | -1412.853544   |
| <b>1a4</b> | -1412.807477  | -1412.447776 | -1412.420966 | -1412.504349 | -1413.249353  | -1412.853609   |
| <b>1a5</b> | -1412.7994602 | -1412.439431 | -1412.412875 | -1412.494917 |               | -1412.8428011  |
| <b>1a6</b> | -1412.7998667 | -1412.439659 | -1412.413232 | -1412.494377 |               | -1412.8426887  |

*E, E', H, G: total energy, total energy with zero point energy (ZPE), enthalpy and Gibbs free energy at B3LYP/6-31G\* level; E'': single point energy at B3LYP/AUG-cc-pVDZ//B3LYP/6-31G\* level in the gas phase; Es: single point energy in methanol solution at B3LYP-SCRF/6-31G\*\*/B3LYP/6-31G\* level with COSMO model.*

**Table S2.** Important Thermodynamic Parameters of Compound **1b** (au)

| Species    | In Gas Phase |              |              |              | In Methanol    |
|------------|--------------|--------------|--------------|--------------|----------------|
|            | E            | E'=E+ZPE     | H            | G            | E <sub>s</sub> |
| <b>1b1</b> | -1801.308869 | -1800.738366 | -1800.699787 | -1800.811788 | -1801.338614   |
| <b>1b2</b> | -1801.309634 | -1800.739151 | -1800.700573 | -1800.812682 | -1801.338739   |
| <b>1b3</b> | -1801.308569 | -1800.738297 | -1800.699583 | -1800.811884 | -1801.335801   |
| <b>1b4</b> | -1801.308806 | -1800.738591 | -1800.699817 | -1800.811878 | -1801.335412   |

*E, E', H, G: total energy, total energy with zero point energy (ZPE), enthalpy and Gibbs free energy at B3LYP/6-31G\* level; Es: single point energy in methanol solution at B3LYP-SCRF/6-31G\*\*/B3LYP/6-31G\* level with COSMO model.*

**Table S3.** Important Thermodynamic Parameters of Compound **2a** (au)

| Species    | E             | E'=E+ZPE     | H            | G            | E <sub>s</sub> |
|------------|---------------|--------------|--------------|--------------|----------------|
| <b>2a1</b> | -1337.593180  | -1337.235234 | -1337.210805 | -1337.288203 | -1337.629679   |
| <b>2a2</b> | -1337.592794  | -1337.234802 | -1337.210358 | -1337.287728 | -1337.628942   |
| <b>2a3</b> | -1337.5954927 | -1337.238807 | -1337.213877 | -1337.292294 | -1337.631035   |
| <b>2a4</b> | -1337.5949927 | -1337.238462 | -1337.213484 | -1337.292091 | -1337.63061    |
| <b>2a5</b> | -1337.6033945 | -1337.246247 | -1337.221508 | -1337.299460 | -1337.638955   |
| <b>2a6</b> | -1337.6031397 | -1337.246038 | -1337.221291 | -1337.299079 | -1337.638666   |

*E, E', H, G: total energy, total energy with zero point energy (ZPE), enthalpy and Gibbs free energy at B3LYP/6-31G\* level; Es: single point energy in methanol solution at B3LYP-SCRF/6-31G\*\*/B3LYP/6-31G\* level with COSMO model.*

**Table S4.** Conformational Analysis of Compound **2a**.

| Species    | $\Delta E^a$ | $P_E\%^b$ | $\Delta E^c$ | $P_E\%^d$ | $\Delta G^e$ | $P_G\%^f$ | $\Delta E_s^g$ | $P_{E_s}\%^h$ |
|------------|--------------|-----------|--------------|-----------|--------------|-----------|----------------|---------------|
| <b>2a1</b> | 6.41         | 0.0       | 6.91         | 0.0       | 7.06         | 0.0       | 5.82           | 0.0           |
| <b>2a2</b> | 6.65         | 0.0       | 7.18         | 0.0       | 7.36         | 0.0       | 6.28           | 0.0           |
| <b>2a3</b> | 4.96         | 0.0       | 4.67         | 0.0       | 4.50         | 0.0       | 4.97           | 0.0           |
| <b>2a4</b> | 5.27         | 0.0       | 4.89         | 0.0       | 4.62         | 0.0       | 5.24           | 0.0           |
| <b>2a5</b> | 0.00         | 56.7      | 0.00         | 55.5      | 0.00         | 59.9      | 0.00           | 57.6          |
| <b>2a6</b> | 0.16         | 43.3      | 0.13         | 44.5      | 0.24         | 40.0      | 0.18           | 42.4          |

<sup>a,c,e</sup> Relative energy, relative energy with ZPE, and relative Gibbs free energy at B3LYP/6-31G\* level in the gas phase, respectively (kcal/mol). <sup>b,d,f</sup> Conformational distribution calculated by using the respective parameters above at B3LYP/6-31G\* level in the gas phase. <sup>g,h</sup> Relative energy (kcal/mol) and conformational distribution in methanol solution at B3LYP-SCRF/6-31G\*\*/B3LYP/6-31G\* level with COSMO model, respectively.

**Table S5.** Important Thermodynamic Parameters of Compounds **3a** (au)

| Species    | E             | E'=E+ZPE     | H            | G            | Es           |
|------------|---------------|--------------|--------------|--------------|--------------|
| <b>3a1</b> | -1412.813887  | -1412.452850 | -1412.426754 | -1412.507309 | -1412.852188 |
| <b>3a2</b> | -1412.8064063 | -1412.446001 | -1412.420578 | -1412.501058 | -1412.848942 |

E, E', H, G: total energy, total energy with zero point energy (ZPE), enthalpy and Gibbs free energy at B3LYP/6-31G\* level; Es: single point energy in methanol solution at B3LYP-SCRF/6-31G\*\*/B3LYP/6-31G\* level with COSMO model.

**Table S6:** Important Thermodynamic Parameters of Compound **4a** (au).

| Species    | In Gas Phase |            |              |            | In Methanol    |
|------------|--------------|------------|--------------|------------|----------------|
|            | E            | E'=E+ZPE   | H            | G          | E <sub>s</sub> |
| <b>4a1</b> | -1412.817301 | -1412.4563 | -1412.430214 | -1412.5109 | -1412.8595     |
| <b>4a2</b> | -1412.817956 | -1412.4569 | -1412.430853 | -1412.5114 | -1412.8596     |
| <b>4a3</b> | -1412.809054 | -1412.4485 | -1412.422065 | -1412.5038 | -1412.855      |
| <b>4a4</b> | -1412.81094  | -1412.4501 | -1412.423825 | -1412.5053 | -1412.8555     |
| <b>4a5</b> | -1412.815785 | -1412.4547 | -1412.428595 | -1412.5097 | -1412.8584     |
| <b>4a6</b> | -1412.816243 | -1412.4551 | -1412.428988 | -1412.5102 | -1412.8585     |

E, E', H, G: total energy, total energy with zero point energy (ZPE), enthalpy and Gibbs free energy in the gas phase at B3LYP/6-31G\* level; E<sub>s</sub>: single point energy in methanol solution at B3LYP-SCRF/6-31G\*\*/B3LYP/6-31G\* level with COSMO model.

**Table S7.** Conformational Analysis of Compound **4a**.

| Species    | In Gas Phase |                      |                 |                      | In Methanol  |                      |                |                         |
|------------|--------------|----------------------|-----------------|----------------------|--------------|----------------------|----------------|-------------------------|
|            | $\Delta E^a$ | $P_E\%$ <sup>b</sup> | $\Delta E^{rc}$ | $P_E\%$ <sup>d</sup> | $\Delta G^e$ | $P_G\%$ <sup>f</sup> | $\Delta E_s^g$ | $P_{ES}\%$ <sup>h</sup> |
| <b>4a1</b> | 0.41         | 28.3                 | 0.40            | 29.2                 | 0.34         | 28.0                 | 0.05           | 36.0                    |
| <b>4a2</b> | 0.00         | 56.7                 | 0.00            | 57.6                 | 0.00         | 50.0                 | 0.00           | 39.5                    |
| <b>4a3</b> | 5.59         | 0.0                  | 5.32            | 0.0                  | 4.80         | 0.0                  | 2.91           | 0.3                     |
| <b>4a4</b> | 4.40         | 0.0                  | 4.29            | 0.0                  | 3.85         | 0.1                  | 2.56           | 0.5                     |
| <b>4a5</b> | 1.36         | 5.7                  | 1.40            | 5.4                  | 1.09         | 7.9                  | 0.76           | 11.0                    |
| <b>4a6</b> | 1.08         | 9.2                  | 1.18            | 7.8                  | 0.75         | 14.0                 | 0.67           | 12.7                    |

<sup>a,c,e</sup> Relative energy, relative energy with ZPE, and relative Gibbs free energy at B3LYP/6-31G\* level in the gas phase, respectively (kcal/mol). <sup>b,d,f</sup> Conformational distribution calculated by using the respective parameters above at B3LYP/6-31G\* level in the gas phase. <sup>g,h</sup> Relative energy (kcal/mol) and conformational distribution in methanol solution at B3LYP-SCRF/6-31G\*\*/B3LYP/6-31G\* level with COSMO model, respectively.

**Table S8.** The geometric parameters for the possible stationary points of compounds **1a** and **1b** in gas phase (Å).

| <b>1a1</b> |           |           |           | <b>1a2</b> |           |           |           |
|------------|-----------|-----------|-----------|------------|-----------|-----------|-----------|
| C          | 1.743264  | 4.156181  | -0.242098 | C          | 1.442204  | 4.201617  | -0.118753 |
| C          | 2.777555  | 3.324637  | -0.688893 | C          | 2.565938  | 3.463378  | -0.510051 |
| C          | 2.541660  | 1.960854  | -0.837514 | C          | 2.444157  | 2.092899  | -0.720497 |
| C          | 1.299538  | 1.387602  | -0.551444 | C          | 1.228338  | 1.423420  | -0.557186 |
| C          | 0.274786  | 2.250412  | -0.135631 | C          | 0.112862  | 2.195130  | -0.199171 |
| C          | 0.485872  | 3.620073  | 0.027116  | C          | 0.209707  | 3.568411  | 0.027954  |
| C          | 1.049368  | -0.105917 | -0.724637 | C          | 1.104751  | -0.076123 | -0.801226 |
| C          | -0.350022 | -0.501718 | -0.228448 | C          | -0.300619 | -0.587582 | -0.449418 |
| C          | -1.385071 | 0.600526  | -0.527405 | C          | -1.381258 | 0.454306  | -0.795882 |
| O          | -0.995262 | 1.800063  | 0.145505  | O          | -1.139821 | 1.645165  | -0.043352 |
| C          | -2.774350 | 0.218334  | -0.066669 | C          | -2.773927 | -0.045646 | -0.484716 |
| C          | -3.597685 | -0.541813 | -0.912634 | C          | -3.323291 | 0.122568  | 0.794534  |
| C          | -4.854334 | -0.963952 | -0.487060 | C          | -4.579110 | -0.393792 | 1.094272  |
| C          | -5.300224 | -0.620929 | 0.800715  | C          | -5.295931 | -1.101256 | 0.111046  |

|   |           |           |           |   |           |           |           |
|---|-----------|-----------|-----------|---|-----------|-----------|-----------|
| C | -4.491484 | 0.135728  | 1.641127  | C | -4.756429 | -1.276444 | -1.156870 |
| C | -3.227337 | 0.550809  | 1.213346  | C | -3.496255 | -0.746542 | -1.456629 |
| C | 2.123699  | -1.034557 | -0.167363 | C | 2.189293  | -0.948952 | -0.177570 |
| O | -0.679719 | -1.708400 | -0.927304 | O | -0.485037 | -1.779322 | -1.224580 |
| C | 2.800826  | -0.808279 | 1.046525  | C | 2.734845  | -0.724152 | 1.101204  |
| C | 3.863178  | -1.612622 | 1.462720  | C | 3.808519  | -1.471064 | 1.588998  |
| C | 4.241967  | -2.703727 | 0.678082  | C | 4.333046  | -2.503666 | 0.809055  |
| C | 3.539848  | -3.015836 | -0.484174 | C | 3.763630  | -2.817584 | -0.423281 |
| C | 2.471992  | -2.202770 | -0.876189 | C | 2.681610  | -2.063139 | -0.887253 |
| O | -6.557902 | -1.082338 | 1.121719  | O | -6.526226 | -1.570477 | 0.514885  |
| O | -5.644634 | -1.698076 | -1.319976 | O | -5.110361 | -0.215838 | 2.335790  |
| O | 1.904044  | 5.504947  | -0.065638 | O | 1.490171  | 5.550151  | 0.115966  |
| O | 2.373151  | 0.236463  | 1.820051  | O | 2.164857  | 0.258985  | 1.862702  |
| O | 1.785629  | -2.585699 | -1.993771 | O | 2.127996  | -2.448464 | -2.076071 |
| O | 5.291942  | -3.458210 | 1.124958  | O | 5.388631  | -3.201793 | 1.328393  |
| H | 3.758539  | 3.739715  | -0.912070 | H | 3.528237  | 3.955361  | -0.638575 |
| H | 3.351651  | 1.314365  | -1.164765 | H | 3.323062  | 1.518312  | -1.001021 |
| H | -0.328649 | 4.258958  | 0.349340  | H | -0.672230 | 4.134862  | 0.304912  |
| H | 1.025066  | -0.291803 | -1.808383 | H | 1.192282  | -0.220334 | -1.888095 |
| H | -0.333596 | -0.673213 | 0.855753  | H | -0.365630 | -0.810185 | 0.623547  |
| H | -1.386995 | 0.778347  | -1.613515 | H | -1.300165 | 0.680856  | -1.869859 |
| H | -3.283246 | -0.796407 | -1.920700 | H | -2.787956 | 0.677160  | 1.557004  |
| H | -4.847951 | 0.403292  | 2.634386  | H | -5.320482 | -1.814589 | -1.916459 |
| H | -2.601958 | 1.149934  | 1.864933  | H | -3.087935 | -0.868517 | -2.455839 |
| H | 4.387498  | -1.415475 | 2.393845  | H | 4.231347  | -1.274616 | 2.570462  |
| H | 3.769770  | -3.899486 | -1.072847 | H | 4.107131  | -3.661020 | -1.015518 |
| H | 5.442890  | -4.179530 | 0.494615  | H | 5.648239  | -3.886480 | 0.692620  |
| H | 2.961639  | 0.316885  | 2.586751  | H | 2.665210  | 0.343568  | 2.689228  |
| H | 0.842121  | -2.364426 | -1.852745 | H | 1.162752  | -2.294512 | -2.017478 |
| H | -1.496948 | -2.077208 | -0.555053 | H | -1.312822 | -2.205505 | -0.949420 |
| H | -6.808089 | -0.763185 | 2.001635  | H | -6.971350 | -2.004232 | -0.228353 |
| H | -6.479721 | -1.871634 | -0.852318 | H | -5.990084 | -0.630638 | 2.340684  |



|            |           |           |           |            |           |           |           |
|------------|-----------|-----------|-----------|------------|-----------|-----------|-----------|
| H          | 2.811714  | 5.742664  | -0.310044 | H          | 2.396241  | 5.858520  | -0.039065 |
| <b>1a3</b> |           |           |           | <b>1a4</b> |           |           |           |
| C          | -0.010886 | -0.009185 | -0.026852 | C          | -0.039780 | 0.014803  | 0.010222  |
| C          | -0.021952 | 0.001519  | 1.372987  | C          | -0.032567 | 0.020823  | 1.410325  |
| C          | 1.188168  | -0.003518 | 2.062582  | C          | 1.186391  | 0.014597  | 2.084033  |
| C          | 2.419349  | -0.020840 | 1.402675  | C          | 2.408669  | 0.001911  | 1.407345  |
| C          | 2.400599  | -0.006546 | -0.001594 | C          | 2.371665  | 0.019859  | 0.003576  |
| C          | 1.199970  | -0.007430 | -0.715257 | C          | 1.161697  | 0.019980  | -0.694171 |
| C          | 3.744871  | -0.002387 | 2.153945  | C          | 3.742861  | 0.018756  | 2.143206  |
| C          | 4.929292  | -0.323590 | 1.218675  | C          | 4.918625  | -0.291090 | 1.193315  |
| C          | 4.754161  | 0.426069  | -0.120602 | C          | 4.723938  | 0.453400  | -0.145669 |
| O          | 3.541826  | -0.007868 | -0.758278 | O          | 3.502660  | 0.022263  | -0.767423 |
| C          | 5.892711  | 0.195722  | -1.089242 | C          | 5.849534  | 0.215674  | -1.126760 |
| C          | 7.027526  | 1.014530  | -1.027792 | C          | 5.803374  | -0.867864 | -2.013741 |
| C          | 8.103880  | 0.799017  | -1.880542 | C          | 6.858510  | -1.109635 | -2.886883 |
| C          | 8.047739  | -0.247464 | -2.815747 | C          | 7.979604  | -0.263374 | -2.873812 |
| C          | 6.924283  | -1.062378 | -2.885219 | C          | 8.032751  | 0.812412  | -1.995279 |
| C          | 5.847192  | -0.844250 | -2.021385 | C          | 6.967538  | 1.052611  | -1.124020 |
| C          | 3.800153  | -0.849869 | 3.417021  | C          | 3.811859  | -0.843335 | 3.395807  |
| O          | 6.168247  | 0.018959  | 1.823882  | O          | 6.161170  | 0.074165  | 1.781377  |
| C          | 4.361887  | -0.329485 | 4.594847  | C          | 4.360908  | -0.331901 | 4.583077  |
| C          | 4.443641  | -1.054554 | 5.783326  | C          | 4.448903  | -1.072948 | 5.761295  |
| C          | 3.979112  | -2.369351 | 5.801255  | C          | 4.003879  | -2.394619 | 5.758436  |
| C          | 3.455666  | -2.947167 | 4.643818  | C          | 3.493700  | -2.963303 | 4.590515  |
| C          | 3.389393  | -2.192573 | 3.466027  | C          | 3.419710  | -2.192566 | 3.423809  |
| O          | 9.161757  | -0.372375 | -3.621553 | O          | 8.968716  | -0.587025 | -3.780849 |
| O          | 9.203770  | 1.606456  | -1.812887 | O          | 6.801467  | -2.164111 | -3.753669 |
| O          | -1.159991 | -0.011754 | -0.773510 | O          | -1.198848 | 0.013849  | -0.720467 |
| O          | 4.858168  | 0.953777  | 4.526269  | O          | 4.839737  | 0.959225  | 4.534616  |
| O          | 2.927413  | -2.744405 | 2.306704  | O          | 2.968332  | -2.732051 | 2.255092  |
| O          | 4.074294  | -3.048241 | 6.982652  | O          | 4.105120  | -3.089385 | 6.929810  |
| H          | -0.965085 | 0.008270  | 1.916099  | H          | -0.968600 | 0.023934  | 1.965661  |

|            |           |           |           |            |           |           |           |
|------------|-----------|-----------|-----------|------------|-----------|-----------|-----------|
| H          | 1.178131  | -0.011094 | 3.149494  | H          | 1.190714  | 0.003039  | 3.171041  |
| H          | 1.217113  | 0.002794  | -1.799275 | H          | 1.165087  | 0.031195  | -1.778243 |
| H          | 3.904124  | 1.036029  | 2.476994  | H          | 3.902431  | 1.053992  | 2.475684  |
| H          | 4.952527  | -1.397160 | 0.997201  | H          | 4.951392  | -1.365116 | 0.975381  |
| H          | 4.671015  | 1.502211  | 0.098933  | H          | 4.648938  | 1.530394  | 0.072425  |
| H          | 7.093861  | 1.823158  | -0.307527 | H          | 4.938543  | -1.520629 | -2.045778 |
| H          | 6.885952  | -1.867483 | -3.617465 | H          | 8.903254  | 1.466317  | -1.992626 |
| H          | 4.965182  | -1.470730 | -2.086834 | H          | 7.018182  | 1.887965  | -0.433159 |
| H          | 4.876024  | -0.627774 | 6.683631  | H          | 4.871947  | -0.653131 | 6.669272  |
| H          | 3.116789  | -3.982253 | 4.647360  | H          | 3.169666  | -4.003056 | 4.577521  |
| H          | 3.738795  | -3.949380 | 6.858208  | H          | 3.784008  | -3.993621 | 6.790569  |
| H          | 5.219514  | 1.196172  | 5.393018  | H          | 5.184715  | 1.197523  | 5.409104  |
| H          | 2.666212  | -3.663562 | 2.471258  | H          | 2.724833  | -3.659058 | 2.401748  |
| H          | 5.989829  | 0.617318  | 2.567721  | H          | 5.979596  | 0.635282  | 2.552812  |
| H          | 9.031426  | -1.108379 | -4.237630 | H          | 9.702222  | 0.039575  | -3.694026 |
| H          | 9.832702  | 1.292719  | -2.484764 | H          | 7.624440  | -2.155874 | -4.271417 |
| H          | -1.919207 | 0.010527  | -0.170943 | H          | -1.949523 | 0.030686  | -0.107153 |
| <b>1a5</b> |           |           |           | <b>1a6</b> |           |           |           |
| C          | -0.155861 | 0.312032  | 0.227544  | C          | 4.374546  | -0.626805 | -1.150238 |
| C          | -0.018936 | 0.684322  | 1.571100  | C          | 4.145808  | 0.743078  | -1.335032 |
| C          | 1.242742  | 0.646680  | 2.156616  | C          | 3.073877  | 1.342454  | -0.681003 |
| C          | 2.379380  | 0.235635  | 1.454464  | C          | 2.205726  | 0.621457  | 0.143822  |
| C          | 2.214617  | -0.122730 | 0.105963  | C          | 2.465132  | -0.748363 | 0.320148  |
| C          | 0.958737  | -0.083958 | -0.507267 | C          | 3.541993  | -1.370887 | -0.318129 |
| C          | 3.752886  | 0.218296  | 2.097832  | C          | 1.052027  | 1.288540  | 0.868527  |
| C          | 4.815188  | 0.355979  | 0.976015  | C          | 0.743409  | 0.457995  | 2.141950  |
| C          | 4.585598  | -0.615977 | -0.197776 | C          | 0.595917  | -1.051981 | 1.862511  |
| O          | 3.247317  | -0.496285 | -0.715960 | O          | 1.721728  | -1.567692 | 1.129851  |
| C          | 4.961687  | -2.073486 | 0.040850  | C          | -0.722225 | -1.480366 | 1.231056  |
| C          | 6.255209  | -2.384515 | 0.489066  | C          | -0.757147 | -2.182668 | 0.022612  |
| C          | 6.656126  | -3.705295 | 0.648948  | C          | -1.971068 | -2.576399 | -0.531478 |
| C          | 5.761545  | -4.744169 | 0.341604  | C          | -3.169965 | -2.304072 | 0.143453  |

|   |           |           |           |   |           |           |           |
|---|-----------|-----------|-----------|---|-----------|-----------|-----------|
| C | 4.486133  | -4.447023 | -0.120796 | C | -3.143163 | -1.637435 | 1.363765  |
| C | 4.087176  | -3.114707 | -0.275017 | C | -1.923259 | -1.226633 | 1.904728  |
| C | 4.045422  | -0.900039 | 3.100234  | C | -0.181742 | 1.659165  | 0.041846  |
| O | 4.837481  | 1.693040  | 0.479922  | O | 1.763753  | 0.660487  | 3.117845  |
| C | 3.396756  | -2.147300 | 3.178664  | C | -0.578997 | 1.083323  | -1.181172 |
| C | 3.737100  | -3.105159 | 4.140059  | C | -1.726410 | 1.502534  | -1.864236 |
| C | 4.749350  | -2.837965 | 5.056652  | C | -2.513128 | 2.521651  | -1.336984 |
| C | 5.416858  | -1.613237 | 5.023256  | C | -2.156173 | 3.128606  | -0.132222 |
| C | 5.055343  | -0.673540 | 4.053959  | C | -1.005477 | 2.690802  | 0.529357  |
| O | 6.258207  | -6.017888 | 0.529325  | O | -4.314335 | -2.746467 | -0.488579 |
| O | 7.916223  | -3.988264 | 1.092834  | O | -1.988453 | -3.222034 | -1.737802 |
| O | -1.362966 | 0.325999  | -0.420266 | O | 5.410440  | -1.287621 | -1.755254 |
| O | 2.399706  | -2.414440 | 2.286769  | O | 0.194193  | 0.093249  | -1.710205 |
| O | 5.693616  | 0.538834  | 3.990124  | O | -0.629391 | 3.262640  | 1.718657  |
| O | 5.043476  | -3.811333 | 5.970611  | O | -3.624305 | 2.890117  | -2.044239 |
| H | -0.886310 | 1.004063  | 2.145268  | H | 4.801008  | 1.329483  | -1.976095 |
| H | 1.353979  | 0.935517  | 3.199462  | H | 2.892463  | 2.405837  | -0.821378 |
| H | 0.858658  | -0.358479 | -1.551523 | H | 3.724034  | -2.428449 | -0.162776 |
| H | 3.860647  | 1.150167  | 2.664140  | H | 1.423906  | 2.237563  | 1.270669  |
| H | 5.810194  | 0.192598  | 1.391102  | H | -0.172594 | 0.824097  | 2.607719  |
| H | 5.210113  | -0.236714 | -1.015648 | H | 0.677882  | -1.537795 | 2.842097  |
| H | 6.979287  | -1.608241 | 0.717952  | H | 0.158576  | -2.416034 | -0.505161 |
| H | 3.801498  | -5.255734 | -0.373013 | H | -4.073805 | -1.436601 | 1.891779  |
| H | 3.095931  | -2.887260 | -0.646440 | H | -1.918580 | -0.711272 | 2.861388  |
| H | 3.220209  | -4.059736 | 4.182679  | H | -2.009048 | 1.046653  | -2.808731 |
| H | 6.211226  | -1.391559 | 5.734566  | H | -2.763396 | 3.927633  | 0.291259  |
| H | 5.769656  | -3.504189 | 6.534729  | H | -4.064739 | 3.618620  | -1.580362 |
| H | 2.140080  | -3.343454 | 2.384730  | H | -0.286968 | -0.322994 | -2.442783 |
| H | 6.357953  | 0.583982  | 4.694424  | H | -1.250081 | 3.974203  | 1.937203  |
| H | 3.942431  | 1.898686  | 0.162462  | H | 2.613136  | 0.449366  | 2.695387  |
| H | 5.600761  | -6.667110 | 0.238424  | H | -5.088727 | -2.513001 | 0.044330  |
| H | 8.001816  | -4.956606 | 1.118368  | H | -2.915541 | -3.441717 | -1.933070 |

|   |           |          |          |   |          |           |           |
|---|-----------|----------|----------|---|----------|-----------|-----------|
| H | -2.043415 | 0.625802 | 0.201944 | H | 5.902531 | -0.655937 | -2.301924 |
|---|-----------|----------|----------|---|----------|-----------|-----------|

| <b>1b1</b> |           |           |           | <b>1b2</b> |           |           |           |
|------------|-----------|-----------|-----------|------------|-----------|-----------|-----------|
| C          | 1.802676  | 4.473839  | -0.336796 | C          | 1.493102  | 4.486934  | -0.336420 |
| C          | 2.866265  | 3.612598  | -0.634352 | C          | 2.637899  | 3.709195  | -0.550756 |
| C          | 2.616156  | 2.244154  | -0.751936 | C          | 2.498510  | 2.330708  | -0.720255 |
| C          | 1.345269  | 1.695117  | -0.580132 | C          | 1.259027  | 1.691498  | -0.687117 |
| C          | 0.295484  | 2.585575  | -0.295740 | C          | 0.125429  | 2.500539  | -0.493947 |
| C          | 0.515948  | 3.955588  | -0.171759 | C          | 0.235614  | 3.878017  | -0.315700 |
| C          | 1.083130  | 0.196078  | -0.720373 | C          | 1.121767  | 0.180572  | -0.872512 |
| C          | -0.301933 | -0.147699 | -0.141298 | C          | -0.290478 | -0.268349 | -0.455968 |
| C          | -1.347929 | 0.877422  | -0.618798 | C          | -1.345419 | 0.693404  | -1.033289 |
| O          | -0.998450 | 2.168473  | -0.100820 | O          | -1.149136 | 1.989760  | -0.446059 |
| C          | -2.756021 | 0.559079  | -0.170712 | C          | -2.768111 | 0.265691  | -0.763853 |
| C          | -3.628484 | -0.107140 | -1.047864 | C          | -3.321059 | 0.418140  | 0.519805  |
| C          | -4.919346 | -0.450350 | -0.655146 | C          | -4.615109 | -0.009367 | 0.795750  |
| C          | -5.361948 | -0.121265 | 0.650781  | C          | -5.388292 | -0.613518 | -0.230413 |
| C          | -4.494371 | 0.543885  | 1.514468  | C          | -4.836405 | -0.762455 | -1.499722 |
| C          | -3.197605 | 0.879976  | 1.108088  | C          | -3.532505 | -0.321372 | -1.764531 |
| C          | 2.185594  | -0.689295 | -0.159498 | C          | 2.214484  | -0.635864 | -0.198247 |
| O          | -0.694687 | -1.441013 | -0.647284 | O          | -0.530152 | -1.575997 | -1.015452 |
| C          | 2.528140  | -0.680935 | 1.210798  | C          | 2.403092  | -0.622487 | 1.201518  |
| C          | 3.525241  | -1.508863 | 1.725659  | C          | 3.394096  | -1.384972 | 1.819021  |
| C          | 4.210103  | -2.371312 | 0.864797  | C          | 4.227647  | -2.187217 | 1.034200  |
| C          | 3.909305  | -2.410941 | -0.497621 | C          | 4.080850  | -2.230159 | -0.352982 |
| C          | 2.898719  | -1.568661 | -0.990066 | C          | 3.074720  | -1.452360 | -0.949764 |
| O          | -6.639942 | -0.490910 | 0.950258  | O          | -6.643917 | -1.002216 | 0.131532  |
| O          | -5.833066 | -1.090335 | -1.442052 | O          | -5.233664 | 0.102321  | 2.004901  |
| O          | 1.915600  | 5.830099  | -0.192459 | O          | 1.496419  | 5.842314  | -0.147301 |
| O          | 1.822456  | 0.193242  | 1.981405  | O          | 1.556039  | 0.189514  | 1.895095  |
| O          | 2.551501  | -1.551935 | -2.316328 | O          | 2.878029  | -1.439145 | -2.306199 |
| O          | 5.169144  | -3.143030 | 1.458361  | O          | 5.168075  | -2.897547 | 1.725788  |
| H          | 3.874382  | 3.985621  | -0.771078 | H          | 3.625655  | 4.153859  | -0.578586 |
| H          | 3.445715  | 1.575733  | -0.966482 | H          | 3.390811  | 1.727339  | -0.864301 |
| H          | -0.313259 | 4.618371  | 0.049435  | H          | -0.656243 | 4.476245  | -0.165491 |
| H          | 1.018874  | -0.033547 | -1.789473 | H          | 1.194570  | -0.034234 | -1.944041 |
| H          | -0.288380 | -0.177104 | 0.947107  | H          | -0.394730 | -0.317598 | 0.626903  |
| H          | -1.314535 | 0.916674  | -1.718545 | H          | -1.189373 | 0.768591  | -2.119740 |
| H          | -3.282386 | -0.352050 | -2.045985 | H          | -2.725888 | 0.893318  | 1.289842  |
| H          | -4.819969 | 0.808121  | 2.514076  | H          | -5.416271 | -1.213959 | -2.296591 |
| H          | -2.540236 | 1.408661  | 1.789852  | H          | -3.122451 | -0.441244 | -2.763639 |
| H          | 3.789662  | -1.514270 | 2.774621  | H          | 3.542958  | -1.384490 | 2.890450  |
| H          | 4.440646  | -3.076911 | -1.161277 | H          | 4.727134  | -2.848586 | -0.957900 |
| C          | 5.899094  | -4.052173 | 0.653262  | C          | 2.741988  | 6.516184  | -0.181049 |

|            |           |           |           |            |           |           |           |
|------------|-----------|-----------|-----------|------------|-----------|-----------|-----------|
| H          | 6.594580  | -4.556844 | 1.326678  | H          | 3.239964  | 6.400568  | -1.153303 |
| H          | 5.241658  | -4.798462 | 0.187250  | H          | 2.516811  | 7.571831  | -0.015861 |
| H          | 6.467743  | -3.533686 | -0.130537 | H          | 3.417018  | 6.162715  | 0.610242  |
| C          | 3.242931  | -2.391747 | -3.222607 | C          | -7.459089 | -1.608658 | -0.854966 |
| H          | 4.315935  | -2.160082 | -3.254356 | H          | -8.403625 | -1.841877 | -0.359736 |
| H          | 3.111010  | -3.453737 | -2.975485 | H          | -7.649390 | -0.929863 | -1.697569 |
| H          | 2.804643  | -2.195181 | -4.203127 | H          | -7.011452 | -2.536506 | -1.236936 |
| C          | 2.044959  | 0.205640  | 3.383225  | C          | -4.495789 | 0.669555  | 3.074355  |
| H          | 1.824911  | -0.771611 | 3.830040  | H          | -3.593396 | 0.084340  | 3.296291  |
| H          | 3.076216  | 0.495001  | 3.622779  | H          | -4.207471 | 1.707762  | 2.861300  |
| H          | 1.358349  | 0.953067  | 3.784224  | H          | -5.162537 | 0.650105  | 3.938602  |
| C          | -5.454984 | -1.413542 | -2.767380 | C          | 3.719421  | -2.221081 | -3.134205 |
| H          | -5.201260 | -0.516002 | -3.347858 | H          | 4.771408  | -1.918215 | -3.046623 |
| H          | -4.601333 | -2.105458 | -2.789906 | H          | 3.632838  | -3.291907 | -2.906604 |
| H          | -6.323627 | -1.899722 | -3.215777 | H          | 3.378969  | -2.043268 | -4.156230 |
| C          | -7.132297 | -0.181076 | 2.242165  | C          | 6.046167  | -3.740821 | 1.000689  |
| H          | -6.542669 | -0.670802 | 3.028986  | H          | 5.500115  | -4.525350 | 0.459839  |
| H          | -7.141699 | 0.902340  | 2.423329  | H          | 6.658465  | -3.171737 | 0.288110  |
| H          | -8.155781 | -0.559977 | 2.269845  | H          | 6.697987  | -4.204202 | 1.743853  |
| C          | 3.194372  | 6.414111  | -0.366348 | C          | 1.638177  | 0.216992  | 3.311586  |
| H          | 3.057786  | 7.486803  | -0.214439 | H          | 1.449732  | -0.774296 | 3.742127  |
| H          | 3.917893  | 6.034673  | 0.368009  | H          | 2.615848  | 0.583316  | 3.649939  |
| H          | 3.586671  | 6.239297  | -1.377398 | H          | 0.861287  | 0.910228  | 3.638758  |
| C          | -0.873034 | -2.449804 | 0.244564  | C          | -0.795610 | -2.597728 | -0.161810 |
| O          | -0.701688 | -2.354613 | 1.438147  | C          | -1.076220 | -3.861730 | -0.940778 |
| C          | -1.327308 | -3.699835 | -0.473093 | H          | -0.259527 | -4.067281 | -1.639597 |
| H          | -1.359200 | -4.532402 | 0.230546  | H          | -1.200430 | -4.695908 | -0.249393 |
| H          | -2.325701 | -3.536828 | -0.893593 | H          | -1.990074 | -3.731210 | -1.530320 |
| H          | -0.652343 | -3.930035 | -1.303024 | O          | -0.812461 | -2.503285 | 1.044492  |
| <b>1b3</b> |           |           |           | <b>1b4</b> |           |           |           |
| C          | 1.703974  | 4.530527  | -0.295885 | C          | 1.083020  | 4.581776  | -0.206191 |
| C          | 2.796719  | 3.730917  | -0.664305 | C          | 2.309526  | 3.940945  | -0.439383 |
| C          | 2.618034  | 2.365478  | -0.835971 | C          | 2.332854  | 2.573739  | -0.675562 |
| C          | 1.373535  | 1.745300  | -0.655264 | C          | 1.165264  | 1.797706  | -0.692461 |
| C          | 0.297776  | 2.567853  | -0.306224 | C          | -0.045164 | 2.463947  | -0.475106 |
| C          | 0.449203  | 3.948632  | -0.120458 | C          | -0.099011 | 3.842633  | -0.228721 |
| C          | 1.179049  | 0.243032  | -0.856646 | C          | 1.196007  | 0.293817  | -0.963326 |
| C          | -0.170441 | -0.190763 | -0.256265 | C          | -0.155033 | -0.328145 | -0.568684 |
| C          | -1.276287 | 0.803202  | -0.662388 | C          | -1.311328 | 0.536032  | -1.106482 |
| O          | -0.973891 | 2.087287  | -0.101371 | O          | -1.260676 | 1.820580  | -0.466758 |
| C          | -2.653396 | 0.397360  | -0.189558 | C          | -2.677243 | -0.060343 | -0.857537 |
| C          | -3.491529 | -0.346431 | -1.030494 | C          | -3.243031 | -0.009909 | 0.424833  |
| C          | -4.741949 | -0.783634 | -0.607131 | C          | -4.481876 | -0.597928 | 0.681587  |
| C          | -5.187906 | -0.469926 | 0.696023  | C          | -5.179149 | -1.240393 | -0.368315 |

|   |           |           |           |   |           |           |           |
|---|-----------|-----------|-----------|---|-----------|-----------|-----------|
| C | -4.362747 | 0.289432  | 1.530219  | C | -4.608989 | -1.287910 | -1.635889 |
| C | -3.105742 | 0.713259  | 1.091183  | C | -3.363418 | -0.705267 | -1.885137 |
| C | 2.336168  | -0.614850 | -0.366692 | C | 2.378756  | -0.436234 | -0.344039 |
| O | -0.517384 | -1.478671 | -0.804452 | O | -0.252203 | -1.629723 | -1.180913 |
| C | 3.070134  | -1.418251 | -1.264818 | C | 3.327437  | -1.091125 | -1.158051 |
| C | 4.118778  | -2.233880 | -0.836179 | C | 4.407071  | -1.790042 | -0.615515 |
| C | 4.452605  | -2.260567 | 0.520879  | C | 4.556925  | -1.845758 | 0.773030  |
| C | 3.757140  | -1.478936 | 1.444920  | C | 3.647591  | -1.206339 | 1.617266  |
| C | 2.710411  | -0.664428 | 0.987072  | C | 2.573056  | -0.507714 | 1.046025  |
| O | -6.419347 | -0.950391 | 1.044115  | O | -6.376479 | -1.879707 | -0.155003 |
| O | -5.489155 | -1.569602 | -1.453705 | O | -5.092493 | -0.612127 | 1.903949  |
| O | 1.964122  | 5.864221  | -0.139734 | O | 1.146782  | 5.927990  | 0.025888  |
| O | 2.690676  | -1.341492 | -2.577719 | O | 3.123907  | -0.990862 | -2.507788 |
| O | 1.990382  | 0.139271  | 1.821918  | O | 1.649204  | 0.155354  | 1.800631  |
| O | 5.487856  | -3.090500 | 0.847591  | O | 5.638789  | -2.555517 | 1.211406  |
| H | 3.766268  | 4.198096  | -0.802480 | H | 3.220698  | 4.529923  | -0.424065 |
| H | 3.471222  | 1.748470  | -1.104348 | H | 3.286563  | 2.079075  | -0.837968 |
| H | -0.428551 | 4.522157  | 0.150588  | H | -1.071940 | 4.290920  | -0.069419 |
| H | 1.095894  | 0.057296  | -1.932950 | H | 1.282463  | 0.149414  | -2.045698 |
| H | -0.124530 | -0.262885 | 0.829219  | H | -0.249243 | -0.433364 | 0.510930  |
| H | -1.276682 | 0.887516  | -1.759811 | H | -1.168046 | 0.673909  | -2.188475 |
| H | -3.178489 | -0.610291 | -2.036655 | H | -2.701814 | 0.500683  | 1.211906  |
| H | -4.686718 | 0.547432  | 2.532159  | H | -5.161886 | -1.792846 | -2.422336 |
| H | -2.478894 | 1.303854  | 1.750707  | H | -2.933976 | -0.749174 | -2.882265 |
| H | 4.688493  | -2.854126 | -1.515152 | H | 5.139457  | -2.297171 | -1.229356 |
| H | 4.014222  | -1.500459 | 2.493593  | H | 3.763849  | -1.248194 | 2.690061  |
| C | 5.877688  | -3.179938 | 2.207673  | C | 5.852970  | -2.667007 | 2.608485  |
| H | 6.219838  | -2.211037 | 2.595369  | H | 6.754834  | -3.271043 | 2.725252  |
| H | 5.060307  | -3.552551 | 2.839209  | H | 6.013452  | -1.685031 | 3.073296  |
| H | 6.706040  | -3.890564 | 2.235170  | H | 5.013835  | -3.169589 | 3.107507  |
| C | 2.231001  | 0.081868  | 3.218128  | C | 1.721252  | 0.073710  | 3.214235  |
| H | 1.521236  | 0.777920  | 3.668565  | H | 1.630722  | -0.963133 | 3.561662  |
| H | 2.053565  | -0.925802 | 3.614187  | H | 2.653249  | 0.509984  | 3.596845  |
| H | 3.252383  | 0.400305  | 3.464679  | H | 0.876091  | 0.655258  | 3.586811  |
| C | 3.385021  | -2.121494 | -3.536207 | C | 4.049174  | -1.610150 | -3.385246 |
| H | 4.448469  | -1.853098 | -3.582472 | H | 4.081785  | -2.697322 | -3.236594 |
| H | 3.293901  | -3.195148 | -3.326147 | H | 3.692364  | -1.393942 | -4.394103 |
| H | 2.914715  | -1.900055 | -4.496254 | H | 5.059674  | -1.199708 | -3.261158 |
| C | -6.685584 | -0.972897 | -1.957616 | C | -4.389785 | -0.060380 | 3.006846  |
| H | -7.393675 | -0.750991 | -1.153181 | H | -3.430254 | -0.569192 | 3.164019  |
| H | -6.459428 | -0.052146 | -2.512493 | H | -4.211352 | 1.015207  | 2.876304  |
| H | -7.124536 | -1.705472 | -2.639294 | H | -5.031055 | -0.216880 | 3.876323  |
| C | -6.882844 | -0.704307 | 2.362110  | C | -7.488121 | -1.036507 | 0.153723  |
| H | -7.856720 | -1.192454 | 2.432037  | H | -7.667914 | -0.315636 | -0.655528 |

|   |           |           |           |   |           |           |           |
|---|-----------|-----------|-----------|---|-----------|-----------|-----------|
| H | -6.206274 | -1.133877 | 3.112283  | H | -8.352289 | -1.699014 | 0.244228  |
| H | -7.000754 | 0.370124  | 2.556616  | H | -7.336796 | -0.500067 | 1.095165  |
| C | 0.892258  | 6.713164  | 0.231801  | C | -0.064784 | 6.620626  | 0.271208  |
| H | 1.314963  | 7.717314  | 0.304685  | H | -0.577155 | 6.236428  | 1.163630  |
| H | 0.093197  | 6.710261  | -0.521834 | H | 0.212979  | 7.663676  | 0.435981  |
| H | 0.467082  | 6.427287  | 1.203459  | H | -0.747936 | 6.559035  | -0.586690 |
| C | -0.665924 | -2.522164 | 0.053582  | C | -0.425277 | -2.705022 | -0.368642 |
| O | -0.485811 | -2.461517 | 1.248562  | O | -0.465860 | -2.655730 | 0.839904  |
| C | -1.105072 | -3.754005 | -0.702087 | C | -0.577777 | -3.959261 | -1.196133 |
| H | -1.069314 | -4.619778 | -0.039811 | H | -0.565779 | -4.831700 | -0.541896 |
| H | -2.130244 | -3.611437 | -1.061932 | H | -1.530053 | -3.920829 | -1.736714 |
| H | -0.466999 | -3.916018 | -1.575758 | H | 0.222187  | -4.028715 | -1.939075 |

**Table S9.** The geometric parameters for the possible stationary points of compound **2a** in gas phase (Å).

| <b>2a1</b> |           |           |           | <b>2a2</b> |           |           |           |
|------------|-----------|-----------|-----------|------------|-----------|-----------|-----------|
| C          | 1.626193  | 4.064124  | -0.495630 | C          | -4.368872 | -0.861948 | -0.954240 |
| C          | 2.736776  | 3.372843  | 0.004503  | C          | -4.368872 | -0.861948 | 0.446385  |
| C          | 2.580387  | 2.069947  | 0.456902  | C          | -3.158258 | -0.861948 | 1.125304  |
| C          | 1.342088  | 1.407863  | 0.446115  | C          | -1.917786 | -0.857532 | 0.466691  |
| C          | 0.254578  | 2.123543  | -0.071965 | C          | -1.954757 | -0.829849 | -0.935370 |
| C          | 0.384745  | 3.435749  | -0.539985 | C          | -3.161065 | -0.835468 | -1.644815 |
| C          | 1.176793  | 0.012266  | 1.076764  | C          | -0.593979 | -0.995006 | 1.246968  |
| C          | -0.310861 | -0.427532 | 0.983421  | C          | 0.571211  | -1.103665 | 0.231950  |
| C          | -1.046219 | 0.166531  | -0.242230 | C          | 0.325657  | -0.263548 | -1.043201 |
| O          | -1.011622 | 1.592518  | -0.142659 | O          | -0.818697 | -0.805705 | -1.707715 |
| C          | -2.489980 | -0.274929 | -0.302125 | C          | 1.501265  | -0.296357 | -1.990688 |
| C          | -3.471261 | 0.394520  | 0.447560  | C          | 2.421430  | 0.765591  | -1.986246 |
| C          | -4.785405 | -0.050523 | 0.431995  | C          | 3.538924  | 0.729708  | -2.812431 |
| C          | -5.152694 | -1.185128 | -0.316667 | C          | 3.762436  | -0.367443 | -3.662747 |
| C          | -4.182277 | -1.852974 | -1.056197 | C          | 2.849649  | -1.419787 | -3.669813 |
| C          | -2.859941 | -1.397329 | -1.051725 | C          | 1.730408  | -1.387620 | -2.836069 |
| C          | 2.271129  | -0.969831 | 0.631033  | C          | -0.477132 | 0.001585  | 2.413785  |
| O          | -0.388106 | -1.856617 | 0.976861  | O          | 1.800334  | -0.739493 | 0.871265  |
| C          | 2.244806  | -1.781422 | -0.525312 | C          | 0.095851  | 1.293179  | 2.372724  |

|            |           |           |           |            |           |           |           |
|------------|-----------|-----------|-----------|------------|-----------|-----------|-----------|
| C          | 3.374727  | -2.483580 | -0.943659 | C          | -0.032674 | 2.178168  | 3.443369  |
| C          | 4.554343  | -2.429224 | -0.201535 | C          | -0.696395 | 1.789727  | 4.606204  |
| C          | 4.589946  | -1.698177 | 0.988570  | C          | -1.198423 | 0.490348  | 4.713040  |
| C          | 3.453932  | -0.992624 | 1.382546  | C          | -1.072842 | -0.373563 | 3.626846  |
| O          | -6.443127 | -1.618037 | -0.324532 | O          | 4.853978  | -0.400178 | -4.475713 |
| O          | -5.818975 | 0.544077  | 1.119705  | O          | 4.492018  | 1.720352  | -2.881169 |
| O          | 1.821186  | 5.343861  | -0.936096 | O          | -5.580332 | -0.870106 | -1.588115 |
| O          | 1.106421  | -1.939955 | -1.274647 | O          | 0.831694  | 1.733861  | 1.299835  |
| O          | 5.626155  | -3.140411 | -0.668132 | O          | -0.786764 | 2.706809  | 5.617588  |
| H          | 3.703545  | 3.864801  | 0.022610  | H          | -5.314772 | -0.865892 | 0.977536  |
| H          | 3.451014  | 1.542772  | 0.833417  | H          | -3.173901 | -0.861658 | 2.210140  |
| H          | -0.494036 | 3.932451  | -0.943554 | H          | -3.123196 | -0.805130 | -2.730824 |
| H          | 1.358516  | 0.142831  | 2.151441  | H          | -0.631034 | -1.976627 | 1.737045  |
| H          | -0.832626 | -0.042616 | 1.871048  | H          | 0.635184  | -2.149388 | -0.099622 |
| H          | -0.518329 | -0.141207 | -1.153422 | H          | 0.108594  | 0.770490  | -0.749836 |
| H          | -3.200514 | 1.280404  | 1.016568  | H          | 2.248634  | 1.632261  | -1.349609 |
| H          | -4.477627 | -2.717257 | -1.642416 | H          | 3.029374  | -2.255753 | -4.338525 |
| H          | -2.118746 | -1.908450 | -1.660694 | H          | 1.014720  | -2.202778 | -2.861497 |
| H          | 3.316493  | -3.098718 | -1.834637 | H          | 0.421576  | 3.160381  | 3.375409  |
| H          | 5.489721  | -1.677702 | 1.600045  | H          | -1.678283 | 0.154602  | 5.630025  |
| H          | 0.979463  | 5.693656  | -1.267170 | H          | -5.433000 | -0.862757 | -2.546640 |
| H          | 6.362239  | -3.037493 | -0.045352 | H          | -1.248482 | 2.299110  | 6.366490  |
| H          | 0.388899  | -2.080102 | -0.617965 | H          | 1.407018  | 0.973907  | 1.056258  |
| H          | -1.332787 | -2.092096 | 0.945516  | H          | 2.510943  | -0.880340 | 0.221311  |
| H          | -5.498084 | 1.341502  | 1.567154  | H          | 4.234350  | 2.465201  | -2.317147 |
| H          | -6.960007 | -1.009918 | 0.231717  | H          | 5.347377  | 0.426858  | -4.337889 |
| H          | 3.496572  | -0.421020 | 2.307405  | H          | -1.467597 | -1.382566 | 3.723695  |
| <b>2a3</b> |           |           |           | <b>2a4</b> |           |           |           |
| C          | -4.424746 | -0.514114 | -0.601422 | C          | 2.511888  | 3.876510  | -0.322564 |
| C          | -4.413393 | -0.500531 | 0.801818  | C          | 3.442584  | 3.070906  | 0.351105  |
| C          | -3.195139 | -0.492370 | 1.464376  | C          | 3.043652  | 1.825613  | 0.813325  |
| C          | -1.964936 | -0.491392 | 0.782515  | C          | 1.738848  | 1.334411  | 0.629258  |



|   |           |           |           |   |           |           |           |
|---|-----------|-----------|-----------|---|-----------|-----------|-----------|
| C | -2.006711 | -0.495904 | -0.623506 | C | 0.828978  | 2.159983  | -0.055832 |
| C | -3.227464 | -0.505421 | -1.312356 | C | 1.212254  | 3.421842  | -0.531136 |
| C | -0.642160 | -0.563882 | 1.539922  | C | 1.306061  | -0.003980 | 1.220552  |
| C | 0.456182  | -1.013550 | 0.547003  | C | -0.239834 | -0.023743 | 1.274867  |
| C | 0.368738  | -0.203556 | -0.766848 | C | -0.837534 | 0.432556  | -0.075838 |
| O | -0.887984 | -0.490660 | -1.408509 | O | -0.467279 | 1.805986  | -0.305720 |
| C | 1.478750  | -0.547246 | -1.733296 | C | -2.346703 | 0.344923  | -0.102204 |
| C | 1.349277  | -1.619591 | -2.627799 | C | -2.952773 | -0.861750 | -0.487350 |
| C | 2.398396  | -1.961836 | -3.473686 | C | -4.338250 | -0.996730 | -0.466390 |
| C | 3.602881  | -1.236375 | -3.419818 | C | -5.133757 | 0.088097  | -0.058702 |
| C | 3.742062  | -0.177811 | -2.531062 | C | -4.539760 | 1.286249  | 0.320978  |
| C | 2.679538  | 0.170113  | -1.689698 | C | -3.148072 | 1.415165  | 0.306471  |
| C | -0.275734 | 0.672316  | 2.365618  | C | 1.929029  | -1.250729 | 0.586813  |
| O | 1.717291  | -0.887191 | 1.169525  | O | -0.667419 | -1.317005 | 1.645037  |
| C | -0.532505 | 2.009038  | 1.987775  | C | 2.218947  | -1.408670 | -0.786785 |
| C | -0.121115 | 3.079037  | 2.785511  | C | 2.747462  | -2.602378 | -1.282981 |
| C | 0.555302  | 2.843625  | 3.979832  | C | 2.999931  | -3.668303 | -0.423214 |
| C | 0.810543  | 1.530917  | 4.390400  | C | 2.738385  | -3.538366 | 0.944997  |
| C | 0.390998  | 0.478901  | 3.582649  | C | 2.214525  | -2.340553 | 1.419917  |
| O | 4.575497  | -1.661308 | -4.297334 | O | -6.490926 | -0.146504 | -0.080464 |
| O | 2.258275  | -2.996850 | -4.348831 | O | -4.914194 | -2.171332 | -0.845944 |
| O | -5.642733 | -0.524517 | -1.217577 | O | 2.940408  | 5.096434  | -0.760557 |
| O | -1.167683 | 2.355396  | 0.823188  | O | 1.986029  | -0.436118 | -1.724398 |
| O | 0.932482  | 3.934202  | 4.716049  | O | 3.517223  | -4.810776 | -0.971061 |
| H | -5.354884 | -0.501084 | 1.340205  | H | 4.452345  | 3.437423  | 0.500380  |
| H | -3.179824 | -0.485993 | 2.551688  | H | 3.759377  | 1.198405  | 1.339455  |
| H | -3.209325 | -0.502071 | -2.399146 | H | 0.476916  | 4.021392  | -1.061581 |
| H | -0.734368 | -1.383268 | 2.263915  | H | 1.634468  | -0.011284 | 2.267542  |
| H | 0.254336  | -2.064669 | 0.278629  | H | -0.557473 | 0.723759  | 2.022146  |
| H | 0.405249  | 0.865964  | -0.525332 | H | -0.414741 | -0.184476 | -0.878288 |
| H | 0.423108  | -2.179591 | -2.691015 | H | -2.356465 | -1.704680 | -0.824294 |
| H | 4.673102  | 0.384989  | -2.499622 | H | -5.163820 | 2.123265  | 0.629404  |

|            |           |           |           |            |           |           |           |
|------------|-----------|-----------|-----------|------------|-----------|-----------|-----------|
| H          | 2.786591  | 1.009342  | -1.008636 | H          | -2.687795 | 2.354388  | 0.590798  |
| H          | -0.342054 | 4.092673  | 2.470367  | H          | 2.965871  | -2.687234 | -2.341569 |
| H          | 1.330278  | 1.334769  | 5.326075  | H          | 2.939679  | -4.361446 | 1.627635  |
| H          | -5.511587 | -0.531623 | -2.178636 | H          | 2.208968  | 5.545455  | -1.212430 |
| H          | 1.382369  | 3.625130  | 5.517471  | H          | 3.639841  | -5.463984 | -0.265025 |
| H          | -1.706886 | 1.600648  | 0.526434  | H          | 1.958183  | 0.427820  | -1.276351 |
| H          | 2.386264  | -1.170512 | 0.524288  | H          | -1.638437 | -1.305633 | 1.675584  |
| H          | 3.087720  | -3.069281 | -4.851667 | H          | -5.878211 | -2.058812 | -0.781999 |
| H          | 5.354378  | -1.089593 | -4.224920 | H          | -6.965878 | 0.658500  | 0.174611  |
| H          | 0.605717  | -0.539154 | 3.896586  | H          | 1.996493  | -2.249165 | 2.480598  |
| <b>2a5</b> |           |           |           | <b>2a6</b> |           |           |           |
| C          | 1.601336  | 4.203373  | -0.251124 | C          | 2.479252  | 3.921071  | -0.334324 |
| C          | 2.615377  | 3.648857  | 0.542091  | C          | 3.373578  | 3.163834  | 0.434745  |
| C          | 2.492238  | 2.333451  | 0.968433  | C          | 2.976045  | 1.915030  | 0.892962  |
| C          | 1.388657  | 1.535403  | 0.633459  | C          | 1.709791  | 1.380662  | 0.614445  |
| C          | 0.389893  | 2.115443  | -0.160943 | C          | 0.835455  | 2.159409  | -0.156220 |
| C          | 0.490549  | 3.440152  | -0.603222 | C          | 1.212854  | 3.421927  | -0.630285 |
| C          | 1.267401  | 0.100661  | 1.117225  | C          | 1.289047  | 0.016799  | 1.133461  |
| C          | -0.236479 | -0.241050 | 1.114883  | C          | -0.251988 | 0.021981  | 1.191649  |
| C          | -0.844164 | 0.053157  | -0.272084 | C          | -0.832760 | 0.424362  | -0.179816 |
| O          | -0.755309 | 1.458766  | -0.539207 | O          | -0.441746 | 1.771755  | -0.479013 |
| C          | -2.296784 | -0.359613 | -0.363669 | C          | -2.343804 | 0.349867  | -0.212317 |
| C          | -3.317702 | 0.515193  | 0.035755  | C          | -2.962917 | -0.865742 | -0.546887 |
| C          | -4.646399 | 0.107162  | 0.005791  | C          | -4.350239 | -0.985101 | -0.522273 |
| C          | -4.966814 | -1.198078 | -0.413513 | C          | -5.134160 | 0.124598  | -0.161689 |
| C          | -3.961464 | -2.072945 | -0.804434 | C          | -4.527097 | 1.331690  | 0.166235  |
| C          | -2.625882 | -1.653885 | -0.783100 | C          | -3.134273 | 1.445224  | 0.148280  |
| C          | 2.151307  | -0.886988 | 0.345903  | C          | 1.898197  | -1.154394 | 0.353468  |
| O          | -0.400316 | -1.608067 | 1.474983  | O          | -0.700773 | -1.266750 | 1.594487  |
| C          | 2.536150  | -2.113324 | 0.940473  | C          | 2.023579  | -2.427038 | 0.962090  |
| C          | 3.446419  | -2.963831 | 0.313313  | C          | 2.694380  | -3.468807 | 0.322191  |
| C          | 3.971771  | -2.627347 | -0.934522 | C          | 3.229842  | -3.277038 | -0.951696 |

|   |           |           |           |   |           |           |           |
|---|-----------|-----------|-----------|---|-----------|-----------|-----------|
| C | 3.581644  | -1.440547 | -1.561032 | C | 3.089076  | -2.042237 | -1.591042 |
| C | 2.689015  | -0.588709 | -0.910719 | C | 2.436848  | -1.002603 | -0.928566 |
| O | -6.310438 | -1.496245 | -0.400785 | O | -6.492918 | -0.096674 | -0.174762 |
| O | -5.631484 | 0.967946  | 0.383474  | O | -4.937314 | -2.168275 | -0.852846 |
| O | 1.754927  | 5.501300  | -0.652801 | O | 2.903266  | 5.146247  | -0.769371 |
| O | 2.071172  | -2.500022 | 2.165656  | O | 1.534128  | -2.681087 | 2.212155  |
| O | 4.855232  | -3.505927 | -1.501866 | O | 3.871278  | -4.339049 | -1.529992 |
| H | 3.472643  | 4.256744  | 0.810421  | H | 4.355151  | 3.566989  | 0.659304  |
| H | 3.276751  | 1.897967  | 1.582746  | H | 3.666766  | 1.322273  | 1.487932  |
| H | -0.309771 | 3.847363  | -1.215983 | H | 0.501301  | 3.989812  | -1.224536 |
| H | 1.591900  | 0.063104  | 2.166444  | H | 1.637511  | -0.078815 | 2.171306  |
| H | -0.743850 | 0.405736  | 1.846865  | H | -0.572227 | 0.779356  | 1.923530  |
| H | -0.256461 | -0.495802 | -1.020515 | H | -0.411552 | -0.250386 | -0.937450 |
| H | -3.087594 | 1.527378  | 0.348544  | H | -2.376909 | -1.728023 | -0.852430 |
| H | -4.215454 | -3.077255 | -1.137943 | H | -5.142224 | 2.187894  | 0.437464  |
| H | -1.845765 | -2.334651 | -1.112145 | H | -2.663318 | 2.390567  | 0.391825  |
| H | 3.728220  | -3.893780 | 0.794361  | H | 2.779974  | -4.431266 | 0.814066  |
| H | 3.986117  | -1.171192 | -2.534741 | H | 3.502443  | -1.884966 | -2.585351 |
| H | 0.986089  | 5.758748  | -1.184944 | H | 2.194398  | 5.558202  | -1.287310 |
| H | 5.130087  | -3.154736 | -2.362924 | H | 4.178745  | -4.072246 | -2.410088 |
| H | 1.128909  | -2.241607 | 2.219225  | H | 0.673884  | -2.221186 | 2.290782  |
| H | -1.343540 | -1.836026 | 1.420371  | H | -1.672451 | -1.279303 | 1.595047  |
| H | -6.480831 | 0.503901  | 0.286197  | H | -5.900384 | -2.045205 | -0.792702 |
| H | -6.450517 | -2.398636 | -0.724706 | H | -6.960761 | 0.721413  | 0.050302  |
| H | 2.429119  | 0.352757  | -1.384540 | H | 2.374785  | -0.034145 | -1.415165 |

**Table S10.** The geometric parameters for the possible stationary points of compound **3a** in gas phase (Å).

| <b>3a1</b> |           |           | <b>3a2</b> |   |          |          |          |
|------------|-----------|-----------|------------|---|----------|----------|----------|
| C          | -0.007608 | 0.060836  | -0.036568  | C | 0.000000 | 0.000000 | 0.000000 |
| C          | -0.008969 | 0.027288  | 1.361324   | C | 0.000000 | 0.000000 | 1.395248 |
| C          | 1.198345  | -0.004628 | 2.053395   | C | 1.215748 | 0.000000 | 2.072688 |

|   |           |           |           |   |           |           |           |
|---|-----------|-----------|-----------|---|-----------|-----------|-----------|
| C | 2.436064  | 0.003256  | 1.387428  | C | 2.438428  | 0.016199  | 1.384430  |
| C | 2.415522  | 0.038579  | -0.014198 | C | 2.417967  | 0.034041  | -0.023137 |
| C | 1.209105  | 0.069815  | -0.721042 | C | 1.197632  | 0.019094  | -0.719813 |
| C | 3.760769  | -0.109854 | 2.131186  | C | 3.762725  | -0.087676 | 2.132944  |
| C | 4.880880  | -0.522163 | 1.147103  | C | 4.880349  | -0.511031 | 1.154894  |
| C | 4.796656  | 0.296232  | -0.162939 | C | 4.791209  | 0.306251  | -0.151487 |
| O | 3.533608  | 0.053031  | -0.811810 | O | 3.535702  | 0.067154  | -0.801656 |
| C | 5.892198  | -0.053907 | -1.142171 | C | 5.889257  | -0.050591 | -1.129428 |
| C | 5.771246  | -1.138963 | -2.019633 | C | 5.694174  | -1.000125 | -2.138725 |
| C | 6.818453  | -1.489850 | -2.872851 | C | 6.739906  | -1.361637 | -2.990385 |
| C | 8.010521  | -0.759447 | -2.853645 | C | 8.000128  | -0.777776 | -2.838596 |
| C | 8.144819  | 0.327853  | -1.981899 | C | 8.208155  | 0.175154  | -1.833863 |
| C | 7.091974  | 0.672009  | -1.141485 | C | 7.158929  | 0.530405  | -0.994070 |
| C | 4.161972  | 1.097599  | 2.979910  | C | 4.161164  | 1.125691  | 2.973998  |
| C | 3.875928  | 2.447565  | 2.678390  | C | 3.859324  | 2.473035  | 2.675371  |
| C | 4.321956  | 3.499554  | 3.483675  | C | 4.301196  | 3.528806  | 3.479067  |
| C | 5.070562  | 3.223248  | 4.622338  | C | 5.062769  | 3.259594  | 4.610299  |
| C | 5.373194  | 1.901890  | 4.965940  | C | 5.382015  | 1.941188  | 4.950364  |
| C | 4.919140  | 0.868345  | 4.144416  | C | 4.930642  | 0.903998  | 4.132099  |
| O | 9.072402  | -1.051287 | -3.661955 | O | 9.063633  | -1.088366 | -3.640169 |
| O | -1.182917 | 0.097616  | -0.725826 | O | -1.136820 | -0.005791 | -0.779539 |
| O | 3.171705  | 2.819553  | 1.569481  | O | 3.141544  | 2.842254  | 1.575703  |
| O | 5.215662  | -0.439218 | 4.436486  | O | 5.238729  | -0.401083 | 4.423233  |
| O | 5.484291  | 4.284406  | 5.378192  | O | 5.472604  | 4.324434  | 5.363908  |
| H | -0.960306 | 0.024345  | 1.882736  | H | -0.940741 | -0.010061 | 1.941129  |
| H | 1.192376  | -0.037122 | 3.139509  | H | 1.227356  | -0.016240 | 3.158886  |
| H | 3.676491  | -0.958391 | 2.816592  | H | 3.671817  | -0.930148 | 2.825308  |
| H | 4.854793  | 1.362316  | 0.095148  | H | 4.856513  | 1.372722  | 0.106716  |
| H | 4.840753  | -1.697040 | -2.052649 | H | 4.708271  | -1.430828 | -2.278205 |
| H | 9.071451  | 0.892847  | -1.985250 | H | 9.189043  | 0.629062  | -1.734563 |
| H | 7.202430  | 1.524489  | -0.475133 | H | 7.327634  | 1.278990  | -0.222977 |
| H | 4.071874  | 4.520136  | 3.220004  | H | 4.041139  | 4.547197  | 3.216532  |

|   |           |           |           |   |           |           |           |
|---|-----------|-----------|-----------|---|-----------|-----------|-----------|
| H | 5.959782  | 1.678522  | 5.856246  | H | 5.978141  | 1.723012  | 5.835654  |
| H | -0.964393 | 0.129511  | -1.673277 | H | -1.919815 | -0.006271 | -0.209425 |
| H | 5.710284  | -0.471074 | 5.269467  | H | 5.752022  | -0.427141 | 5.245002  |
| H | 5.975947  | 3.953176  | 6.145270  | H | 5.982043  | 3.997090  | 6.120945  |
| H | 2.647917  | 2.057135  | 1.259211  | H | 2.652344  | 2.067962  | 1.240524  |
| H | 8.847572  | -1.813058 | -4.218632 | H | 8.781197  | -1.742777 | -4.297934 |
| O | 4.721834  | -1.909612 | 0.894084  | O | 4.707022  | -1.896140 | 0.901471  |
| H | 5.417265  | -2.174730 | 0.269506  | H | 5.306344  | -2.137004 | 0.174750  |
| H | 5.855122  | -0.314877 | 1.610745  | H | 5.856882  | -0.313017 | 1.618628  |
| O | 1.175475  | 0.112186  | -2.093051 | O | 1.203431  | 0.023650  | -2.082993 |
| H | 2.096636  | 0.180765  | -2.399089 | H | 0.273398  | 0.019323  | -2.367699 |
| H | 6.705002  | -2.329724 | -3.556240 | H | 6.569765  | -2.093106 | -3.778742 |

**Table S11.** The geometric parameters for the possible stationary points of compound **4a** in gas phase (Å).

| <b>4a1</b> |           |           |           | <b>4a2</b> |           |           |           |
|------------|-----------|-----------|-----------|------------|-----------|-----------|-----------|
| C          | -1.214549 | 4.152187  | -0.082174 | C          | 1.624315  | 4.129116  | 0.219770  |
| C          | -2.411156 | 3.431123  | -0.158483 | C          | 2.731442  | 3.286759  | 0.370710  |
| C          | -2.361970 | 2.056866  | -0.359664 | C          | 2.527837  | 1.918666  | 0.505254  |
| C          | -1.154292 | 1.359443  | -0.493703 | C          | 1.249554  | 1.345203  | 0.500527  |
| C          | 0.027983  | 2.109976  | -0.423615 | C          | 0.159158  | 2.215502  | 0.360509  |
| C          | 0.005880  | 3.492534  | -0.214987 | C          | 0.337268  | 3.594631  | 0.215689  |
| C          | -1.092701 | -0.143165 | -0.769076 | C          | 1.014214  | -0.152744 | 0.697200  |
| C          | 0.296433  | -0.676432 | -0.382017 | C          | -0.380476 | -0.523754 | 0.165900  |
| C          | 1.392919  | 0.215088  | -1.004956 | C          | -1.432699 | 0.453640  | 0.734829  |
| O          | 1.284172  | 1.560129  | -0.532961 | O          | -1.150401 | 1.794684  | 0.336175  |
| C          | 2.783958  | -0.283954 | -0.676098 | C          | -2.831168 | 0.111105  | 0.265101  |
| C          | -2.256303 | -0.960326 | -0.216119 | C          | 2.136770  | -1.061383 | 0.206236  |
| C          | 3.460191  | 0.180847  | 0.463961  | C          | -3.573079 | -0.858987 | 0.958109  |
| C          | 4.709820  | -0.333467 | 0.792565  | C          | -4.824014 | -1.247363 | 0.498259  |
| C          | 5.304891  | -1.332585 | 0.003147  | C          | -5.367531 | -0.676529 | -0.668334 |

|   |           |           |           |   |           |           |           |
|---|-----------|-----------|-----------|---|-----------|-----------|-----------|
| C | 4.632159  | -1.796672 | -1.124529 | C | -4.636665 | 0.287363  | -1.353894 |
| C | 3.382359  | -1.274145 | -1.461164 | C | -3.374704 | 0.677524  | -0.893021 |
| C | -2.687957 | -0.925394 | 1.132928  | C | 2.685771  | -1.018196 | -1.099580 |
| C | -3.836450 | -1.604853 | 1.552188  | C | 3.795848  | -1.792924 | -1.452672 |
| C | -4.561121 | -2.364613 | 0.640557  | C | 4.362335  | -2.654394 | -0.519957 |
| C | -4.145829 | -2.460508 | -0.691053 | C | 3.825981  | -2.757984 | 0.767169  |
| C | -3.007286 | -1.759609 | -1.095909 | C | 2.728963  | -1.962930 | 1.107677  |
| O | -2.582170 | -1.827904 | -2.402800 | O | 2.188388  | -2.037875 | 2.371691  |
| O | 6.529044  | -1.833722 | 0.326674  | O | -6.596677 | -1.055914 | -1.114137 |
| O | -2.043910 | -0.209771 | 2.086624  | O | 2.200594  | -0.206188 | -2.068691 |
| O | -5.668944 | -3.019034 | 1.104366  | O | 5.438417  | -3.398323 | -0.919523 |
| O | 0.406104  | -0.679297 | 1.039875  | O | -0.362969 | -0.463998 | -1.257467 |
| O | 5.455991  | 0.068229  | 1.877312  | O | -5.626698 | -2.182470 | 1.110711  |
| O | -1.298815 | 5.503396  | 0.119266  | O | 1.860449  | 5.470551  | 0.085881  |
| H | -3.355288 | 3.954311  | -0.051195 | H | 3.728622  | 3.713664  | 0.370232  |
| H | -3.290464 | 1.495693  | -0.404279 | H | 3.387721  | 1.263140  | 0.605510  |
| H | 0.950991  | 4.028214  | -0.169291 | H | -0.541679 | 4.225548  | 0.108434  |
| H | -1.140576 | -0.277087 | -1.855585 | H | 0.950090  | -0.334173 | 1.776037  |
| H | 0.413703  | -1.696958 | -0.771620 | H | -0.634350 | -1.540770 | 0.496848  |
| H | 1.250063  | 0.203434  | -2.095995 | H | -1.387024 | 0.386614  | 1.832920  |
| H | 3.019557  | 0.977880  | 1.057380  | H | -3.172700 | -1.308409 | 1.866244  |
| H | 5.106298  | -2.559722 | -1.733603 | H | -5.070035 | 0.730483  | -2.244988 |
| H | 2.875068  | -1.639128 | -2.350642 | H | -2.826098 | 1.455793  | -1.412288 |
| H | -4.138714 | -1.552899 | 2.591249  | H | 4.191423  | -1.731585 | -2.459384 |
| H | -4.697301 | -3.072594 | -1.403722 | H | 4.252467  | -3.448017 | 1.494327  |
| H | 6.834803  | -1.368267 | 1.124262  | H | -6.939546 | -1.725886 | -0.497939 |
| H | 5.009343  | 0.799802  | 2.329514  | H | -5.190990 | -2.519460 | 1.907829  |
| H | 1.319109  | -0.903561 | 1.286185  | H | -1.277506 | -0.485666 | -1.588192 |
| H | -3.230097 | -2.337211 | -2.912716 | H | 2.747551  | -2.616708 | 2.911624  |
| H | -6.070360 | -3.514475 | 0.374177  | H | 5.724894  | -3.957915 | -0.181613 |
| H | -1.106517 | -0.102759 | 1.826056  | H | 1.260571  | -0.007167 | -1.879520 |
| H | -0.402256 | 5.870957  | 0.154993  | H | 1.012526  | 5.927889  | -0.024318 |

| 4a3 |           |           |           | 4a4 |           |           |           |
|-----|-----------|-----------|-----------|-----|-----------|-----------|-----------|
| C   | 0.043881  | -0.069637 | -0.047355 | C   | 1.253846  | 4.183328  | -0.037272 |
| C   | 0.025351  | -0.155439 | 1.350041  | C   | 2.423109  | 3.494561  | 0.307330  |
| C   | 1.229652  | -0.138180 | 2.043468  | C   | 2.351219  | 2.131443  | 0.568574  |
| C   | 2.469054  | -0.040542 | 1.397247  | C   | 1.149095  | 1.414711  | 0.503258  |
| C   | 2.458290  | 0.017386  | -0.004726 | C   | -0.011280 | 2.135734  | 0.181103  |
| C   | 1.257975  | 0.012192  | -0.724874 | C   | 0.037750  | 3.507008  | -0.096262 |
| C   | 3.790753  | -0.034141 | 2.166582  | C   | 1.075598  | -0.083379 | 0.802998  |
| C   | 4.964689  | 0.393093  | 1.242855  | C   | -0.286633 | -0.667243 | 0.340652  |
| C   | 4.809435  | -0.343279 | -0.107241 | C   | -1.401908 | 0.300971  | 0.794764  |
| O   | 3.601634  | 0.096958  | -0.756076 | O   | -1.250545 | 1.557335  | 0.101558  |
| C   | 5.957949  | -0.142370 | -1.064650 | C   | -2.806974 | -0.195756 | 0.567086  |
| C   | 3.765683  | 0.744780  | 3.475314  | C   | 2.264069  | -0.896558 | 0.305412  |
| C   | 6.879359  | -1.180688 | -1.262246 | C   | -3.324454 | -0.330588 | -0.730693 |
| C   | 7.965368  | -1.008628 | -2.112336 | C   | -4.612769 | -0.807192 | -0.918770 |
| C   | 8.148182  | 0.203212  | -2.796222 | C   | -5.418821 | -1.163851 | 0.177215  |
| C   | 7.229700  | 1.233393  | -2.608280 | C   | -4.909383 | -1.030695 | 1.464334  |
| C   | 6.145755  | 1.064383  | -1.746667 | C   | -3.613020 | -0.544067 | 1.653705  |
| C   | 3.296468  | 2.066587  | 3.591293  | C   | 2.760236  | -0.838645 | -1.009954 |
| C   | 3.283435  | 2.759334  | 4.801583  | C   | 3.852425  | -1.591601 | -1.439764 |
| C   | 3.769379  | 2.134155  | 5.949252  | C   | 4.478816  | -2.455768 | -0.542462 |
| C   | 4.259255  | 0.830024  | 5.883516  | C   | 4.015415  | -2.561195 | 0.768696  |
| C   | 4.254309  | 0.159370  | 4.654754  | C   | 2.919675  | -1.788345 | 1.170851  |
| O   | 4.737067  | -1.120692 | 4.562715  | O   | 2.441326  | -1.878516 | 2.451825  |
| O   | 9.208587  | 0.369570  | -3.639439 | O   | -6.685150 | -1.631549 | -0.021103 |
| O   | 2.825026  | 2.670100  | 2.451151  | O   | 2.130683  | 0.014648  | -1.884183 |
| O   | 3.741948  | 2.852693  | 7.110267  | O   | 5.540942  | -3.176202 | -1.008751 |
| O   | 5.078264  | 1.790282  | 1.056928  | O   | -0.363312 | -0.923079 | -1.051314 |
| O   | 8.920294  | -1.973481 | -2.366645 | O   | -5.208427 | -0.972897 | -2.152756 |
| O   | -1.160529 | -0.081257 | -0.699304 | O   | 1.360760  | 5.523976  | -0.296331 |
| H   | -0.926397 | -0.227522 | 1.865898  | H   | 3.362802  | 4.034380  | 0.358942  |
| H   | 1.213615  | -0.185569 | 3.129355  | H   | 3.262327  | 1.593958  | 0.818523  |

|            |           |           |           |            |           |           |           |
|------------|-----------|-----------|-----------|------------|-----------|-----------|-----------|
| H          | 1.304195  | 0.060974  | -1.810110 | H          | -0.889255 | 4.019758  | -0.341222 |
| H          | 4.010013  | -1.071333 | 2.443686  | H          | 1.076261  | -0.198038 | 1.892579  |
| H          | 5.905054  | 0.067217  | 1.702686  | H          | -0.443228 | -1.629269 | 0.842242  |
| H          | 4.709515  | -1.419002 | 0.108234  | H          | -1.267275 | 0.485945  | 1.871364  |
| H          | 6.745741  | -2.134601 | -0.752536 | H          | -2.703056 | -0.075068 | -1.582719 |
| H          | 7.381260  | 2.165358  | -3.144152 | H          | -5.539431 | -1.302311 | 2.305495  |
| H          | 5.441751  | 1.873007  | -1.596483 | H          | -3.230926 | -0.433008 | 2.665427  |
| H          | 2.914215  | 3.778860  | 4.865748  | H          | 4.217605  | -1.526905 | -2.460709 |
| H          | 4.647045  | 0.338834  | 6.774886  | H          | 4.494922  | -3.240092 | 1.472395  |
| H          | 9.717661  | -0.458930 | -3.630158 | H          | -6.835971 | -1.652652 | -0.981805 |
| H          | 8.707643  | -2.776992 | -1.869403 | H          | -4.570179 | -0.750371 | -2.846899 |
| H          | 4.187998  | 2.178561  | 1.101704  | H          | 0.233648  | -0.306169 | -1.508252 |
| H          | 5.008896  | -1.418129 | 5.444187  | H          | 2.994301  | -2.497079 | 2.952810  |
| H          | 4.115351  | 2.314614  | 7.825151  | H          | 5.879365  | -3.740326 | -0.296472 |
| H          | 2.532672  | 3.569986  | 2.664586  | H          | 2.569363  | -0.034187 | -2.747847 |
| H          | -0.998129 | -0.016700 | -1.653167 | H          | 0.480710  | 5.870024  | -0.511136 |
| <b>4a5</b> |           |           |           | <b>4a6</b> |           |           |           |
| C          | -1.175452 | 4.123329  | -0.244499 | C          | -1.590400 | 4.120135  | -0.287114 |
| C          | -2.369497 | 3.411056  | -0.403901 | C          | -2.686629 | 3.279565  | -0.512090 |
| C          | -2.327251 | 2.026538  | -0.515824 | C          | -2.486057 | 1.907085  | -0.596430 |
| C          | -1.125711 | 1.306606  | -0.476263 | C          | -1.218224 | 1.324515  | -0.466448 |
| C          | 0.053111  | 2.050539  | -0.322793 | C          | -0.139823 | 2.194942  | -0.252024 |
| C          | 0.040552  | 3.441942  | -0.203382 | C          | -0.312533 | 3.577488  | -0.157063 |
| C          | -1.061624 | -0.213698 | -0.646172 | C          | -0.977850 | -0.180939 | -0.602855 |
| C          | 0.292594  | -0.715537 | -0.103264 | C          | 0.385284  | -0.524868 | 0.032114  |
| C          | 1.412404  | 0.124524  | -0.754866 | C          | 1.448229  | 0.427693  | -0.555808 |
| O          | 1.304522  | 1.460674  | -0.233250 | O          | 1.159756  | 1.749336  | -0.076911 |
| C          | 2.811107  | -0.388021 | -0.485303 | C          | 2.870500  | 0.079537  | -0.167632 |
| C          | -2.294593 | -0.976086 | -0.172011 | C          | -2.145374 | -1.068856 | -0.184863 |
| C          | 3.672065  | 0.252599  | 0.414996  | C          | 3.461280  | -1.061215 | -0.735493 |
| C          | 4.939195  | -0.265891 | 0.657582  | C          | 4.750229  | -1.434209 | -0.382380 |
| C          | 5.374474  | -1.433865 | 0.010827  | C          | 5.486784  | -0.673082 | 0.544231  |



|   |           |           |           |   |           |           |           |
|---|-----------|-----------|-----------|---|-----------|-----------|-----------|
| C | 4.520983  | -2.067339 | -0.888954 | C | 4.906605  | 0.461594  | 1.098826  |
| C | 3.251040  | -1.545393 | -1.135447 | C | 3.606298  | 0.835938  | 0.745778  |
| C | -2.805411 | -0.928507 | 1.148623  | C | -2.742885 | -1.049283 | 1.099959  |
| C | -4.019769 | -1.533551 | 1.488090  | C | -3.899562 | -1.783301 | 1.382302  |
| C | -4.736298 | -2.231907 | 0.522351  | C | -4.467280 | -2.582859 | 0.396490  |
| C | -4.247569 | -2.339600 | -0.783333 | C | -3.886065 | -2.663741 | -0.872827 |
| C | -3.043102 | -1.711094 | -1.109020 | C | -2.742705 | -1.907531 | -1.142698 |
| O | -2.550519 | -1.787026 | -2.391332 | O | -2.161936 | -1.958051 | -2.389734 |
| O | 6.617532  | -1.938069 | 0.250291  | O | 6.753724  | -1.038583 | 0.886320  |
| O | -2.163681 | -0.274359 | 2.145213  | O | -2.247843 | -0.300846 | 2.112711  |
| O | -5.911075 | -2.815790 | 0.907853  | O | -5.589653 | -3.290744 | 0.726747  |
| O | 0.398293  | -0.594679 | 1.325240  | O | 0.376757  | -0.385400 | 1.461758  |
| O | 5.856909  | 0.296408  | 1.517792  | O | 5.413156  | -2.531319 | -0.885942 |
| O | -1.258112 | 5.484250  | -0.138493 | O | -1.827674 | 5.464604  | -0.208601 |
| H | -3.309353 | 3.952090  | -0.430850 | H | -3.676145 | 3.713484  | -0.608495 |
| H | -3.255862 | 1.474565  | -0.624160 | H | -3.339889 | 1.255134  | -0.754250 |
| H | 0.985284  | 3.967437  | -0.087735 | H | 0.559433  | 4.204690  | 0.010995  |
| H | -1.007579 | -0.413540 | -1.722571 | H | -0.836415 | -0.388585 | -1.669917 |
| H | 0.421301  | -1.774923 | -0.341485 | H | 0.642844  | -1.565741 | -0.186139 |
| H | 1.234891  | 0.154351  | -1.838742 | H | 1.349815  | 0.418418  | -1.650975 |
| H | 3.359259  | 1.170681  | 0.904557  | H | 2.912831  | -1.661202 | -1.461084 |
| H | 4.868385  | -2.964604 | -1.391132 | H | 5.485171  | 1.046759  | 1.806662  |
| H | 2.600351  | -2.048859 | -1.846369 | H | 3.174059  | 1.734389  | 1.170361  |
| H | -4.378770 | -1.476263 | 2.508636  | H | -4.328713 | -1.743101 | 2.376233  |
| H | -4.795176 | -2.902909 | -1.537927 | H | -4.315083 | -3.305408 | -1.641553 |
| H | 7.046809  | -1.358351 | 0.902733  | H | 6.966226  | -1.852274 | 0.397718  |
| H | 5.474214  | 1.082693  | 1.934749  | H | 4.830615  | -3.020735 | -1.485707 |
| H | 0.898898  | 0.221673  | 1.501757  | H | 0.840844  | 0.443795  | 1.673916  |
| H | -3.192800 | -2.259362 | -2.942268 | H | -2.721895 | -2.496794 | -2.968874 |
| H | -6.296708 | -3.279169 | 0.148658  | H | -5.869711 | -3.812882 | -0.040535 |
| H | -1.201151 | -0.259292 | 1.938797  | H | -1.283516 | -0.171048 | 1.962981  |
| H | -0.365581 | 5.847202  | -0.029352 | H | -0.990298 | 5.923100  | -0.038524 |

**Table S12.** Frequencies of Compounds **1a** and **1b**

| Species    | Frequencies (cm <sup>-1</sup> )                                                                                                                                                                                                                                                                                                                                                                                                                                                                                                                                                                                                                |
|------------|------------------------------------------------------------------------------------------------------------------------------------------------------------------------------------------------------------------------------------------------------------------------------------------------------------------------------------------------------------------------------------------------------------------------------------------------------------------------------------------------------------------------------------------------------------------------------------------------------------------------------------------------|
| <b>1a1</b> | 27 28 44 50 55 63 88 133 139 158 181 207 214 222 230 242 253 266 289<br>310 311 325 332 344 347 351 360 374 375 396 403 439 446 457 467 480<br>510 532 540 557 573 589 598 608 615 634 638 642 648 651 662 705 717<br>735 758 780 782 796 799 802 815 856 863 882 885 925 938 967 987 1032<br>1039 1063 1082 1086 1098 1133 1143 1179 1183 1186 1192 1196 1203<br>1223 1226 1229 1242 1256 1274 1294 1300 1304 1325 1326 1337 1350<br>1356 1368 1373 1379 1398 1400 1411 1425 1444 1501 1517 1520 1552<br>1556 1567 1645 1662 1663 1679 1682 1684 3011 3014 3057 3170 3172<br>3195 3198 3199 3207 3231 3234 3584 3716 3738 3751 3753 3754 3772 |
| <b>1a2</b> | 23 32 43 50 54 62 88 128 141 158 172 208 220 231 232 242 250 268 284<br>309 313 321 331 344 349 354 360 369 377 396 404 438 447 463 470 477<br>516 531 537 559 563 586 599 608 615 634 638 642 650 654 659 704 717<br>735 757 780 783 790 795 802 807 852 862 885 892 910 937 982 994 1031<br>1039 1062 1077 1085 1098 1138 1143 1177 1184 1187 1192 1195 1206<br>1223 1227 1228 1243 1254 1268 1288 1296 1301 1328 1329 1339 1349<br>1360 1369 1372 1381 1398 1400 1414 1429 1445 1503 1518 1519 1553<br>1555 1565 1645 1658 1662 1679 1681 1684 3010 3014 3058 3169 3173<br>3195 3197 3200 3202 3231 3235 3586 3717 3737 3750 3753 3754 3771 |
| <b>1a3</b> | 23 28 31 42 50 57 75 129 136 155 179 192 206 213 214 234 245 259 270<br>286 304 311 324 334 338 348 349 358 368 374 399 406 426 445 455 463<br>478 511 534 535 558 577 590 601 612 614 632 632 642 648 663 702 715<br>733 745 758 776 785 798 800 805 858 864 877 886 916 933 965 986 1031<br>1036 1060 1069 1090 1117 1133 1143 1174 1182 1186 1196 1198 1216<br>1222 1229 1230 1242 1248 1262 1281 1298 1299 1310 1323 1336 1355<br>1365 1371 1381 1388 1405 1407 1412 1415 1440 1501 1508 1519 1552<br>1567 1579 1643 1665 1669 1681 1683 1683 3000 3023 3075 3160 3166<br>3168 3194 3202 3219 3231 3232 3720 3722 3754 3754 3755 3756 3773 |

|            |                                                                                                                                                                                                                                                                                                                                                                                                                                                                                                                                                                                                                                                                                       |
|------------|---------------------------------------------------------------------------------------------------------------------------------------------------------------------------------------------------------------------------------------------------------------------------------------------------------------------------------------------------------------------------------------------------------------------------------------------------------------------------------------------------------------------------------------------------------------------------------------------------------------------------------------------------------------------------------------|
| <b>1a4</b> | <p>15 26 31 37 48 57 73 126 136 155 169 191 199 211 223 233 243 253 261</p> <p>284 306 310 326 334 345 347 352 358 368 373 399 406 425 444 462 467</p> <p>477 517 531 534 560 567 586 601 612 614 632 632 639 649 658 703 715</p> <p>733 747 757 776 784 788 796 806 855 862 886 889 905 932 978 993 1032</p> <p>1036 1060 1064 1091 1114 1138 1144 1174 1184 1186 1194 1197 1218</p> <p>1220 1226 1230 1243 1248 1262 1276 1290 1298 1311 1327 1338 1358</p> <p>1364 1369 1379 1385 1405 1406 1413 1415 1440 1503 1508 1518 1553</p> <p>1565 1578 1643 1664 1669 1681 1682 1683 3000 3022 3075 3160 3168</p> <p>3169 3194 3201 3212 3232 3234 3719 3722 3754 3755 3755 3756 3774</p> |
| <b>1a5</b> | <p>12 22 37 46 58 62 120 126 146 160 172 196 206 218 228 236 246 248 268</p> <p>291 306 313 331 333 340 342 352 353 361 375 398 407 428 456 464 476</p> <p>486 506 533 541 566 587 594 602 607 614 630 634 641 644 698 700 725</p> <p>735 743 760 783 785 792 801 823 848 855 878 894 910 925 926 961 983</p> <p>1040 1040 1061 1067 1118 1133 1147 1173 1180 1182 1193 1196 1212</p> <p>1220 1227 1232 1248 1252 1257 1283 1286 1298 1304 1322 1335 1342</p> <p>1362 1363 1377 1383 1393 1400 1419 1425 1445 1500 1508 1511 1553</p> <p>1566 1575 1643 1662 1667 1681 1682 1684 3054 3061 3143 3160 3163</p> <p>3168 3188 3196 3204 3228 3245 3718 3721 3754 3754 3756 3760 3773</p> |
| <b>1a6</b> | <p>20 25 38 47 59 63 117 126 146 164 177 191 198 218 232 237 250 258 272</p> <p>306 314 319 332 334 337 352 354 358 364 377 399 409 437 462 466 471</p> <p>486 512 535 552 569 583 588 602 605 616 630 633 639 641 697 699 726</p> <p>734 744 759 778 786 790 799 818 848 855 881 895 910 920 925 965 993</p> <p>1038 1040 1060 1067 1114 1138 1147 1172 1181 1182 1190 1197 1213</p> <p>1221 1227 1229 1249 1251 1258 1283 1287 1291 1301 1331 1335 1342</p> <p>1362 1364 1378 1383 1391 1398 1419 1424 1443 1500 1509 1517 1553</p> <p>1563 1573 1642 1662 1666 1680 1682 1683 3056 3061 3138 3156 3168</p> <p>3169 3188 3196 3199 3230 3252 3716 3717 3746 3754 3754 3760 3773</p> |
|            |                                                                                                                                                                                                                                                                                                                                                                                                                                                                                                                                                                                                                                                                                       |
| <b>1b1</b> | <p>14 20 23 26 32 33 46 49 53 60 78 81 85 93 93 95 119 128 142 151 154 177</p>                                                                                                                                                                                                                                                                                                                                                                                                                                                                                                                                                                                                        |

|            |                                                                                                                                                                                                                                                                                                                                                                                                                                                                                                                                                                                                                                                                                                                                                                                                                                                                                                                                                                                                                           |
|------------|---------------------------------------------------------------------------------------------------------------------------------------------------------------------------------------------------------------------------------------------------------------------------------------------------------------------------------------------------------------------------------------------------------------------------------------------------------------------------------------------------------------------------------------------------------------------------------------------------------------------------------------------------------------------------------------------------------------------------------------------------------------------------------------------------------------------------------------------------------------------------------------------------------------------------------------------------------------------------------------------------------------------------|
|            | <p>179 187 189 197 212 221 226 227 240 251 252 254 261 277 290 293 317<br/> 319 331 345 368 373 384 391 421 432 461 472 475 490 511 525 536 551<br/> 559 581 598 600 608 620 622 641 643 651 654 676 694 713 720 740 750<br/> 782 785 787 805 816 825 849 858 862 864 929 932 939 951 963 969 983<br/> 1004 1068 1069 1075 1076 1078 1087 1090 1096 1103 1114 1154 1170<br/> 1175 1183 1185 1185 1185 1186 1186 1198 1203 1203 1210 1220 1221<br/> 1222 1228 1229 1231 1245 1255 1270 1277 1282 1294 1311 1317 1328<br/> 1329 1340 1360 1360 1382 1387 1395 1407 1415 1422 1465 1470 1482<br/> 1494 1499 1500 1501 1506 1511 1512 1515 1519 1519 1520 1520 1521<br/> 1522 1527 1534 1535 1535 1536 1537 1546 1552 1573 1628 1641 1645<br/> 1660 1664 1678 1836 3006 3018 3021 3022 3022 3023 3034 3070 3072<br/> 3074 3078 3079 3080 3081 3098 3135 3152 3153 3154 3155 3155 3162<br/> 3170 3182 3192 3216 3218 3228 3229 3231 3251 3265</p>                                                                              |
| <b>1b2</b> | <p>15 19 22 24 31 33 41 50 55 60 80 82 85 93 96 98 113 127 140 149 163 178<br/> 181 186 192 197 206 214 225 226 243 248 253 258 266 274 288 291 317<br/> 327 332 345 371 375 384 392 424 434 461 472 475 494 512 525 537 551<br/> 561 574 595 597 609 620 622 642 643 653 656 674 694 713 721 740 748<br/> 775 782 788 800 815 815 846 859 863 878 907 931 939 955 958 982 993<br/> 1006 1063 1069 1071 1076 1078 1086 1088 1097 1103 1112 1153 1169<br/> 1177 1184 1184 1185 1186 1186 1187 1198 1202 1202 1210 1219 1222<br/> 1222 1227 1228 1231 1245 1253 1270 1276 1280 1294 1309 1315 1318<br/> 1327 1339 1358 1360 1381 1386 1397 1413 1421 1423 1467 1470 1481<br/> 1494 1500 1500 1501 1506 1510 1512 1515 1519 1520 1521 1521 1521<br/> 1521 1527 1534 1535 1535 1536 1537 1546 1552 1571 1627 1641 1645<br/> 1660 1664 1678 1833 3016 3020 3022 3023 3024 3024 3033 3072 3073<br/> 3077 3079 3081 3082 3083 3096 3136 3152 3154 3155 3155 3155 3160<br/> 3168 3182 3191 3192 3226 3229 3229 3240 3253 3267</p> |
| <b>1b3</b> | <p>16 20 22 24 32 37 44 46 58 59 74 81 83 91 98 102 120 132 135 146 150<br/> 167 170 177 182 197 207 210 215 225 231 242 254 255 272 277 278 295</p>                                                                                                                                                                                                                                                                                                                                                                                                                                                                                                                                                                                                                                                                                                                                                                                                                                                                      |

|            |                                                                                                                                                                                                                                                                                                                                                                                                                                                                                                                                                                                                                   |
|------------|-------------------------------------------------------------------------------------------------------------------------------------------------------------------------------------------------------------------------------------------------------------------------------------------------------------------------------------------------------------------------------------------------------------------------------------------------------------------------------------------------------------------------------------------------------------------------------------------------------------------|
|            | 306 323 330 343 350 373 380 405 420 455 463 469 476 483 507 522 529<br>552 567 583 593 598 607 616 620 638 643 655 665 672 686 717 738 743<br>749 769 789 796 810 816 828 845 853 868 903 937 941 947 953 959 971<br>984 1005 1057 1067 1071 1076 1078 1085 1088 1096 1103 1110 1139<br>1163 1173 1183 1184 1184 1185 1185 1186 1193 1195 1201 1208 1219<br>1220 1222 1223 1228 1238 1246 1254 1265 1270 1280 1292 1309 1315<br>1317 1321 1346 1350 1367 1374 1381                                                                                                                                                |
| <b>1b4</b> | 13 19 20 24 31 36 38 45 53 56 78 82 84 88 95 103 113 116 128 146 161<br>168 176 180 182 195 206 209 218 220 232 244 254 261 274 275 291 295<br>299 306 330 344 349 373 391 410 427 455 465 470 480 484 510 527 544<br>557 558 578 585 597 599 605 620 636 643 653 663 670 686 717 737 742<br>746 771 789 798 811 813 839 846 852 869 877 936 938 948 955 967 982<br>991 1006 1048 1066 1072 1075 1077 1078 1088 1097 1104 1110 1139<br>1154 1172 1183 1184 1184 1185 1185 1187 1192 1197 1201 1208 1219<br>1220 1222 1227 1227 1238 1245 1251 1265 1271 1279 1293 1301 1313<br>1319 1322 1343 1348 1366 1374 1387 |

**Table S13.** Frequencies of Compound **2a**

| Species    | Frequencies (cm <sup>-1</sup> )                                                                                                                                                                                                                                                                                                                                                                                                                                                                                                                                                                                                   |
|------------|-----------------------------------------------------------------------------------------------------------------------------------------------------------------------------------------------------------------------------------------------------------------------------------------------------------------------------------------------------------------------------------------------------------------------------------------------------------------------------------------------------------------------------------------------------------------------------------------------------------------------------------|
| <b>2a1</b> | 23 29 40 44 52 78 117 134 161 168 210 214 231 246 253 256 273 285 309<br>313 339 347 361 362 365 377 414 442 444 457 465 475 479 502 514 523<br>547 561 573 585 606 633 638 645 655 681 698 709 722 749 757 772 775<br>790 797 821 831 838 846 862 866 868 934 939 957 982 989 997 1001 1076<br>1086 1108 1133 1139 1146 1179 1185 1192 1196 1198 1208 1222 1229<br>1242 1257 1268 1286 1295 1299 1318 1325 1337 1346 1353 1362 1374<br>1390 1397 1410 1425 1435 1440 1491 1497 1522 1549 1554 1577 1641<br>1648 1662 1674 1676 1682 3015 3036 3064 3166 3183 3191 3192 3192<br>3209 3220 3224 3230 3502 3688 3714 3750 3752 3770 |
| <b>2a2</b> | 22 29 39 45 52 83 119 144 164 169 205 212                                                                                                                                                                                                                                                                                                                                                                                                                                                                                                                                                                                         |

|            |                                                                                                                                                                                                                                                                                                                                                                                                                                                                                                                                                                                                                                  |
|------------|----------------------------------------------------------------------------------------------------------------------------------------------------------------------------------------------------------------------------------------------------------------------------------------------------------------------------------------------------------------------------------------------------------------------------------------------------------------------------------------------------------------------------------------------------------------------------------------------------------------------------------|
|            | 225 246 248 256 272 279 310 312 335 347 353 364<br>366 377 413 439 443 453 467 468 476 495 502 525<br>552 564 580 588 603 634 638 644 659 680 698 709<br>719 752 759 770 785 792 802 820 831 841 850 864<br>867 870 939 947 954 963 991 994 1001 1083 1089 1108 1133<br>1136 1144 1184 1185 1193 1196 1200 1209 1222 1234 1240 1254 1266<br>1284 1300 1303 1313 1331 1340 1345 1346 1362 1373 1394 1398 1416<br>1428 1429 1441 1488 1501 1522 1550 1554 1579 1640 1648 1663 1674<br>1676 1682 3021 3039 3067 3167 3168 3184 3191 3210 3211 3224 3225<br>3230 3478 3703 3713 3751 3752 3768                                       |
| <b>2a3</b> | 27 29 41 52 54 65 87 134 149 162 186 201 221 232 234 251 257 286 312<br>325 345 347 356 361 372 375 380 419 435 443 458 464 477 478 494 505<br>525 551 559 579 591 609 636 640 645 649 668 698 703 728 752 758 771<br>784 799 805 823 831 855 859 871 893 912 924 953 972 983 998 1001 1065<br>1086 1125 1139 1141 1149 1177 1184 1191 1196 1204 1214 1226 1228<br>1239 1251 1264 1266 1288 1305 1312 1319 1330 1346 1352 1365 1373<br>1378 1384 1397 1409 1422 1444 1496 1515 1519 1551 1553 1565 1642<br>1645 1660 1674 1679 1687 2978 3043 3066 3171 3175 3189 3195 3195<br>3206 3226 3230 3234 3659 3716 3718 3750 3753 3771 |
| <b>2a4</b> | 23 29 42 50 55 65 88 139 150 162 193 195 220 226 232 251 257 284 311<br>323 343 346 354 359 368 374 377 418 437 441 455 463 466 477 492 495<br>524 557 564 586 591 609 637 639 643 650 668 698 702 728 753 759 770<br>786 799 809 823 830 858 865 871 879 920 923 952 961 983 987 1001 1069<br>1085 1124 1133 1141 1150 1177 1184 1192 1198 1204 1214 1226 1227<br>1237 1248 1262 1267 1302 1303 1311 1319 1328 1346 1349 1363 1371<br>1378 1383 1397 1410 1419 1440 1495 1514 1517 1550 1553 1567 1642<br>1645 1661 1673 1679 1687 2976 3042 3066 3171 3172 3189 3194 3196<br>3210 3227 3231 3232 3661 3716 3720 3750 3752 3771 |
| <b>2a5</b> | 25 28 44 49 52 78 99 133 154 166 186 210 230 239 247 248 257 294 312                                                                                                                                                                                                                                                                                                                                                                                                                                                                                                                                                             |

|            |                                                                                                                                                                                                                                                                                                                                                                                                                                                                                                                                                                                                                                  |
|------------|----------------------------------------------------------------------------------------------------------------------------------------------------------------------------------------------------------------------------------------------------------------------------------------------------------------------------------------------------------------------------------------------------------------------------------------------------------------------------------------------------------------------------------------------------------------------------------------------------------------------------------|
|            | 326 335 343 347 362 367 374 384 423 437 446 461 464 478 480 509 516<br>545 557 581 595 611 622 630 638 646 650 669 703 708 732 748 765 776<br>786 801 805 823 829 860 864 871 893 911 937 950 976 991 997 998 1072<br>1086 1112 1123 1139 1147 1184 1185 1194 1197 1205 1212 1226 1228<br>1239 1245 1257 1286 1299 1303 1316 1326 1330 1350 1353 1364 1373<br>1378 1384 1402 1417 1424 1441 1497 1514 1518 1552 1555 1565 1640<br>1649 1658 1677 1678 1683 3012 3033 3044 3171 3175 3188 3192 3203<br>3209 3224 3231 3235 3591 3715 3716 3751 3751 3771                                                                          |
| <b>2a6</b> | 27 30 47 50 51 77 100 138 155 166 189 210 223 229 245 250 255 295 311<br>325 335 340 346 364 367 371 383 422 441 444 460 464 467 478 507 516<br>547 567 587 594 612 618 630 638 645 651 670 703 708 731 749 764 777<br>790 800 812 823 830 864 868 871 879 923 936 952 965 986 994 997 1076<br>1087 1112 1123 1134 1148 1184 1185 1195 1197 1204 1212 1226 1227<br>1237 1245 1259 1295 1300 1303 1315 1325 1330 1349 1351 1362 1372<br>1379 1382 1403 1416 1419 1438 1496 1513 1516 1552 1555 1567 1641<br>1649 1661 1677 1678 1683 3010 3033 3044 3171 3172 3188 3191 3206<br>3207 3225 3231 3233 3589 3715 3719 3752 3752 3771 |

**Table S14.** Frequencies of Compound **3a**

| Species    | Frequencies (cm <sup>-1</sup> )                                                                                                                                                                                                                                                                                                                                                                                                                                                                                                                                            |
|------------|----------------------------------------------------------------------------------------------------------------------------------------------------------------------------------------------------------------------------------------------------------------------------------------------------------------------------------------------------------------------------------------------------------------------------------------------------------------------------------------------------------------------------------------------------------------------------|
| <b>3a1</b> | 28 34 42 48 50 57 86 127 135 158 165 194 213 222 237 238 245 283 300<br>313 326 335 341 342 357 361 370 376 379 398 408 429 442 449 483 512<br>518 529 533 544 561 572 587 603 606 617 628 638 650 655 666 720 734<br>738 741 757 793 811 823 832 838 845 849 867 914 926 944 964 987 1008<br>1032 1033 1054 1072 1103 1108 1138 1176 1176 1191 1202 1209 1211<br>1225 1232 1242 1249 1258 1262 1272 1303 1311 1312 1322 1330 1343<br>1357 1380 1385 1396 1407 1411 1412 1420 1437 1488 1510 1520 1560<br>1563 1566 1648 1653 1659 1676 1682 1690 3036 3049 3090 3157 3170 |

|            |                                                                                                                                                                                                                                                                                                                                                                                                                                                                                                                                                                                                                                                   |
|------------|---------------------------------------------------------------------------------------------------------------------------------------------------------------------------------------------------------------------------------------------------------------------------------------------------------------------------------------------------------------------------------------------------------------------------------------------------------------------------------------------------------------------------------------------------------------------------------------------------------------------------------------------------|
|            | 3185 3195 3215 3220 3223 3240 3623 3711 3713 3717 3751 3755 3759                                                                                                                                                                                                                                                                                                                                                                                                                                                                                                                                                                                  |
| <b>3a2</b> | 28 33 42 47 50 57 85 127 134 158 164 193 213 221 236 238 244 282 299<br>312 325 334 341 342 357 360 369 375 378 397 408 428 441 448 483 512<br>517 528 533 543 561 571 587 603 606 617 627 638 650 655 665 720 733<br>737 740 756 792 810 823 831 837 845 848 867 913 925 943 963 986<br>1008 1032 1032 1053 1072 1102 1107 1138 1175 1176 1190 1202 1209<br>1210 1225 1231 1241 1248 1257 1261 1271 1303 1311 1311 1321 1329<br>1342 1356 1380 1384 1395 1406 1411 1412 1419 1437 1487 1510 1520<br>1559 1562 1566 1648 1653 1658 1676 1681 1689 3035 3048 3090 3157<br>3170 3185 3195 3215 3219 3223 3240 3622 3711 3713 3717 3750 3754<br>3758 |

**Table S15.** Frequencies of Compound **4a**

| Species    | Frequencies (cm <sup>-1</sup> )                                                                                                                                                                                                                                                                                                                                                                                                                                                                                                                                                                                                               |
|------------|-----------------------------------------------------------------------------------------------------------------------------------------------------------------------------------------------------------------------------------------------------------------------------------------------------------------------------------------------------------------------------------------------------------------------------------------------------------------------------------------------------------------------------------------------------------------------------------------------------------------------------------------------|
| <b>4a1</b> | 29 32 37 47 49 61 93 127 148 167 182 211 223 224 239 253 255 261 267<br>287 311 317 325 335 337 343 355 358 388 395 401 443 464 469 469 503<br>520 532 538 558 572 591 602 607 621 627 633 638 656 682 701 705 726<br>744 754 775 787 801 817 824 832 836 844 862 881 922 938 960 978 981<br>1014 1033 1065 1083 1128 1137 1139 1176 1181 1188 1194 1203 1210<br>1211 1214 1226 1243 1252 1275 1286 1297 1315 1328 1331 1338 1348<br>1360 1366 1370 1390 1400 1416 1422 1431 1446 1490 1495 1520 1553<br>1567 1576 1650 1652 1664 1674 1678 1691 3014 3040 3068 3155 3188<br>3189 3196 3205 3220 3225 3239 3587 3713 3715 3753 3755 3760 3769 |
| <b>4a2</b> | 25 33 38 47 49 62 95 129 149 176 186 202 216 223 233 238 251 262 264<br>286 313 315 330 338 342 348 361 361 390 400 403 439 457 463 469 496<br>517 531 539 575 584 591 603 608 621 630 634 639 662 683 701 703 726<br>743 751 778 795 802 816 825 833 839 842 856 877 922 948 959 963 987<br>1008 1033 1065 1087 1130 1132 1142 1178 1182 1189 1194 1202 1210                                                                                                                                                                                                                                                                                 |



|            |                                                                                                                                                                                                                                                                                                                                                                                                                                                                                                                                                                                                                                               |
|------------|-----------------------------------------------------------------------------------------------------------------------------------------------------------------------------------------------------------------------------------------------------------------------------------------------------------------------------------------------------------------------------------------------------------------------------------------------------------------------------------------------------------------------------------------------------------------------------------------------------------------------------------------------|
|            | 1212 1215 1233 1244 1251 1276 1294 1300 1310 1327 1331 1337 1340<br>1358 1368 1370 1392 1403 1417 1422 1431 1448 1488 1498 1520 1553<br>1567 1578 1649 1652 1661 1676 1678 1691 3005 3033 3066 3155 3161<br>3189 3203 3213 3224 3229 3239 3577 3698 3716 3752 3755 3759 3772                                                                                                                                                                                                                                                                                                                                                                  |
| <b>4a3</b> | 16 30 41 46 52 58 89 134 149 170 177 197 221 224 235 240 255 263 275<br>278 312 314 329 334 338 348 350 364 379 393 402 436 440 462 466 469<br>503 518 533 537 562 590 599 602 616 630 633 638 657 681 703 706 743<br>746 757 769 787 789 804 820 828 830 841 852 885 916 928 952 965 984<br>1014 1038 1058 1068 1132 1137 1140 1175 1181 1192 1197 1206 1208<br>1214 1220 1232 1249 1257 1261 1282 1291 1304 1318 1329 1333 1354<br>1363 1369 1378 1397 1404 1407 1417 1437 1465 1494 1499 1509 1553<br>1577 1579 1649 1667 1667 1676 1678 1684 3011 3064 3075 3161 3186<br>3189 3190 3200 3215 3218 3220 3702 3715 3752 3754 3756 3760 3772 |
| <b>4a4</b> | 16 33 39 44 50 58 89 137 149 173 181 192 206 221 224 239 253 260 264<br>275 309 311 325 333 336 344 349 362 377 393 397 433 435 457 462 471<br>497 517 534 538 573 590 599 602 615 627 632 637 661 681 703 707 742<br>744 752 772 788 801 803 817 830 832 840 852 877 917 939 952 959 987<br>1003 1038 1058 1074 1132 1136 1140 1177 1184 1192 1194 1205 1208<br>1213 1219 1235 1250 1257 1260 1284 1299 1304 1317 1329 1333 1345<br>1361 1369 1378 1397 1405 1412 1417 1426 1463 1490 1502 1509 1553<br>1577 1580 1649 1667 1668 1676 1678 1684 2997 3061 3073 3156 3160<br>3189 3190 3200 3211 3220 3248 3705 3718 3752 3753 3756 3760 3774 |
| <b>4a5</b> | 15 31 37 41 59 62 90 122 143 165 183 213 218 222 226 235 256 262 267<br>287 311 319 333 339 345 353 355 379 389 400 402 434 463 465 470 504<br>522 533 544 559 594 601 604 616 619 632 636 657 685 700 702 714 726<br>747 753 768 790 801 815 828 832 835 844 861 880 924 935 962 976 982<br>1017 1033 1065 1074 1108 1129 1138 1175 1182 1192 1193 1197 1207<br>1211 1220 1228 1244 1253 1280 1286 1293 1305 1317 1328 1346 1350<br>1360 1370 1378 1395 1398 1412 1427 1434 1463 1491 1494 1523 1551                                                                                                                                         |

|            |                                                                                                                                                                                                                                                                                                                                                                                                                                                                                                                                                                                                                                               |
|------------|-----------------------------------------------------------------------------------------------------------------------------------------------------------------------------------------------------------------------------------------------------------------------------------------------------------------------------------------------------------------------------------------------------------------------------------------------------------------------------------------------------------------------------------------------------------------------------------------------------------------------------------------------|
|            | 1570 1580 1647 1654 1667 1678 1679 1691 3032 3064 3109 3156 3184<br>3190 3196 3208 3219 3225 3240 3464 3690 3717 3753 3755 3761 3773                                                                                                                                                                                                                                                                                                                                                                                                                                                                                                          |
| <b>4a6</b> | 23 29 36 39 58 61 89 123 143 170 189 203 214 218 230 233 246 263 270<br>282 310 314 329 338 342 346 362 383 386 395 402 434 457 462 471 497<br>517 533 544 579 592 601 603 616 619 633 636 662 684 695 701 705 726<br>746 750 771 795 803 814 829 832 836 842 858 878 924 946 959 967 986<br>1010 1033 1066 1079 1111 1129 1138 1179 1183 1190 1194 1198 1208<br>1210 1219 1236 1248 1254 1279 1285 1299 1305 1316 1326 1341 1348<br>1353 1369 1381 1395 1400 1414 1432 1434 1462 1487 1495 1522 1550<br>1570 1580 1647 1653 1665 1679 1679 1691 3021 3063 3097 3155 3158<br>3191 3204 3214 3224 3235 3240 3466 3695 3717 3753 3755 3759 3772 |
